# Supplementary material for: Grinding and the anisotropic environment: influences on the diastereoselective formation of Group 15 allyl complexes
Source: Royal Society of Chemistry journal article supplement (doi:10.1039/d4mr00001c), 2024-01-01
Supplement: d4mr00001c1.pdf [file d4mr00001c1.pdf]

**SUPPORTING INFORMATION**

FOR

**Grinding and the anisotropic environment: Influences on the  
diastereoselective formation of Group 15 allyl complexes**

**Lauren E. Wenger, Timothy P. Hanusa\***

Department of Chemistry, Vanderbilt University, VU Station B #351822,  
Nashville, Tennessee 37235 USA

## Table of Contents

|                                                                                                                                                                       |     |
|-----------------------------------------------------------------------------------------------------------------------------------------------------------------------|-----|
| Abbreviations.....                                                                                                                                                    | S4  |
| General Considerations.....                                                                                                                                           | S4  |
| Materials.....                                                                                                                                                        | S4  |
| Mechanochemical protocol .....                                                                                                                                        | S4  |
| Table S1. Structural parameters for EX <sub>3</sub> (E = As, Sb; X = Cl, I).....                                                                                      | S6  |
| Experimental Details for the Preparation of [AsA' <sub>3</sub> ] .....                                                                                                | S7  |
| Sample mechanochemical synthesis of [AsA' <sub>3</sub> ] from AsI <sub>3</sub> .....                                                                                  | S7  |
| Table S2. <sup>1</sup> H NMR shifts used to determine ratios of C <sub>1</sub> [AsA' <sub>3</sub> ], C <sub>3</sub> [AsA' <sub>3</sub> ], and {A'} <sub>2</sub> ..... | S7  |
| Table S3. Milling conditions for the synthesis of [AsA' <sub>3</sub> ] without pre-grinding <sup>a</sup> .....                                                        | S8  |
| Figure S1. [AsA' <sub>3</sub> ] C <sub>1</sub> :C <sub>3</sub> : Milling Material .....                                                                               | S9  |
| Figure S2. [AsA' <sub>3</sub> ] Yield: Milling Material .....                                                                                                         | S9  |
| Figure S3. [AsA' <sub>3</sub> ]:{A'} <sub>2</sub> ratio: Milling Material .....                                                                                       | S10 |
| Figure S4. [AsA' <sub>3</sub> ] Yield: Ball Size .....                                                                                                                | S10 |
| Figure S5. [AsA' <sub>3</sub> ]:{A'} <sub>2</sub> ratio: Ball Size .....                                                                                              | S11 |
| Mechanochemical synthesis of [AsA' <sub>3</sub> ] from AsCl <sub>3</sub> .....                                                                                        | S12 |
| Solution synthesis of [AsA' <sub>3</sub> ] from AsI <sub>3</sub> .....                                                                                                | S12 |
| Solution synthesis of [AsA' <sub>3</sub> ] from AsCl <sub>3</sub> .....                                                                                               | S12 |
| LAG reactions with AsI <sub>3</sub> .....                                                                                                                             | S13 |
| Table S4. Milling conditions for the synthesis of [AsA' <sub>3</sub> ] under LAG conditions .....                                                                     | S13 |
| Table S5. Milling conditions for the synthesis of [AsA' <sub>3</sub> ] under LAG conditions and results.....                                                          | S13 |
| Figure S6. [AsA' <sub>3</sub> ] Yield: LAG .....                                                                                                                      | S14 |
| Figure S7. [AsA' <sub>3</sub> ]:{A'} <sub>2</sub> ratio: LAG .....                                                                                                    | S14 |
| Pre-grinding of AsI <sub>3</sub> .....                                                                                                                                | S15 |
| Table S6. Milling conditions for the synthesis of [AsA' <sub>3</sub> ] with pre-grinding <sup>a</sup> .....                                                           | S15 |
| Figure S8. [AsA' <sub>3</sub> ] Yield: Pre-Grinding .....                                                                                                             | S16 |
| Figure S9. [AsA' <sub>3</sub> ] to {A'} <sub>2</sub> ratio: Pre-Grinding .....                                                                                        | S17 |
| Decomposition study: Milling [AsA' <sub>3</sub> ] alone or with KI .....                                                                                              | S18 |
| Table S7. Conditions for milling decomposition studies .....                                                                                                          | S18 |
| Decomposition study: Heating [AsA' <sub>3</sub> ] in toluene-d <sub>8</sub> .....                                                                                     | S18 |
| Figure S10. Change in C <sub>1</sub> :C <sub>3</sub> by milling prepared [AsA' <sub>3</sub> ] .....                                                                   | S19 |
| Figure S11. Change in [AsA' <sub>3</sub> ] to {A'} <sub>2</sub> by milling prepared [AsA' <sub>3</sub> ] .....                                                        | S19 |
| Experimental Details for the Preparation of [SbA' <sub>3</sub> ] .....                                                                                                | S20 |

|                                                                                                                                                             |     |
|-------------------------------------------------------------------------------------------------------------------------------------------------------------|-----|
| Sample mechanochemical synthesis of $[\text{SbA}'_3]$ from $\text{SbCl}_3$ .....                                                                            | S20 |
| Table S8. $^1\text{H}$ NMR shifts used to determine ratios of $\text{C}_1$ $[\text{SbA}'_3]$ , $\text{C}_3$ $[\text{SbA}'_3]$ , and $\{\text{A}'\}_2$ ..... | S20 |
| Sample mechanochemical synthesis of $[\text{SbA}'_3]$ from $\text{SbI}_3$ .....                                                                             | S20 |
| Table S9. Milling conditions for the synthesis of $[\text{SbA}'_3]$ without pre-grinding <sup>a</sup> .....                                                 | S21 |
| Figure S12. $[\text{SbA}'_3]$ $\text{C}_1$ : $\text{C}_3$ : Mill, Material, Sb source.....                                                                  | S22 |
| Figure S13. $[\text{SbA}'_3]$ Yield: Mill, Material, Sb source.....                                                                                         | S23 |
| LAG reactions with $\text{SbCl}_3$ .....                                                                                                                    | S25 |
| Solution synthesis of $[\text{SbA}'_3]$ from $\text{SbCl}_3$ .....                                                                                          | S25 |
| Table S10. Conditions for the synthesis of $[\text{SbA}'_3]$ from $\text{SbCl}_3$ under LAG or solution conditions.....                                     | S25 |
| Figure S15. $[\text{SbA}'_3]$ Yield: LAG .....                                                                                                              | S26 |
| Figure S16. $[\text{SbA}'_3]$ to $\{\text{A}'\}_2$ ratio: LAG .....                                                                                         | S26 |
| Pre-Grinding of $\text{SbCl}_3$ and $\text{SbI}_3$ .....                                                                                                    | S27 |
| Table S11. Milling conditions for the synthesis of $[\text{SbA}'_3]$ with pre-grinding .....                                                                | S27 |
| Figure S17. $[\text{SbA}'_3]$ Yield: Pre-Grinding .....                                                                                                     | S28 |
| Figure S18. $[\text{SbA}'_3]$ to $\{\text{A}'\}_2$ ratio: Pre-Grinding .....                                                                                | S29 |
| Photographs of Pre-Ground Samples .....                                                                                                                     | S30 |
| Figure S19. $\text{AsI}_3$ ground in the mixer mill at 10 Hz for 30 s. ....                                                                                 | S30 |
| Figure S20. $\text{AsI}_3$ ground in the mixer mill at 10 Hz for 1 min (left) or 2 min (right).....                                                         | S30 |
| Figure S21. $\text{AsI}_3$ ground in the mixer mill at 10 Hz for 5 min. (left) or 10 min. (right).....                                                      | S31 |
| Figure S22. $\text{AsI}_3$ ground in the mixer mill at 30 Hz for 2 min.....                                                                                 | S31 |
| Scanning Electron Microscopy .....                                                                                                                          | S32 |
| Procedure for SEM.....                                                                                                                                      | S32 |
| Figure S23. SEM image of unground $\text{AsI}_3$ .....                                                                                                      | S32 |
| Figure S24. SEM Image of ground $\text{AsI}_3$ .....                                                                                                        | S33 |
| Powder X-Ray Diffraction .....                                                                                                                              | S34 |
| Procedure for PXRD .....                                                                                                                                    | S34 |
| Figure S25. PXRD of $\text{AsI}_3$ after grinding .....                                                                                                     | S34 |
| References .....                                                                                                                                            | S35 |

**Abbreviations:**

[A'] = [1,3-(SiMe<sub>3</sub>)<sub>2</sub>C<sub>3</sub>H<sub>3</sub>]<sup>-</sup>

HMDSO = hexamethyldisiloxane

LAG = liquid assisted grinding

MM = mixer mill

PBM or PM = planetary ball mill

SS = stainless steel

THF = tetrahydrofuran

ZrO<sub>2</sub> = zirconia

**General Considerations.** All manipulations were performed with the rigorous exclusion of air and moisture using Schlenk and glovebox techniques under a nitrogen atmosphere. Unless otherwise indicated, the glovebox used was free of ethereal solvents; reactions involving THF or HMDSO were performed in another glovebox that stores ethereal solvents.

Proton (<sup>1</sup>H) NMR spectra were obtained on an AV-400 spectrometer at 400 MHz or an AV-600 spectrometer at 600 MHz at room temperature and were referenced to the residual proton resonances of benzene-d<sub>6</sub> or toluene-d<sub>8</sub>.

**Materials.** Anhydrous Group 15 halides (AsCl<sub>3</sub>, AsI<sub>3</sub>, SbCl<sub>3</sub>, SbI<sub>3</sub>) were purchased from Strem Chemicals and used as received. The potassium allyl K[A'] = K[1,3-(SiMe<sub>3</sub>)<sub>2</sub>C<sub>3</sub>H<sub>3</sub>] was synthesized by transmetalation of Li[A']<sup>1</sup> with potassium *tert*-butoxide in hexanes solution. Hexanes and THF were distilled under nitrogen over NaK/benzophenone radical,<sup>2</sup> then stored over 4 Å molecular sieves in a glovebox. Toluene was degassed with argon and dried over activated alumina using a solvent purification system, then stored over 4 Å molecular sieves in a glovebox. Benzene-d<sub>6</sub> and toluene-d<sub>8</sub> were obtained from Sigma Aldrich, degassed, and stored over 4 Å molecular sieves in a glovebox. HMDSO was used as received and stored over 4 Å molecular sieves in a glovebox.

**Mechanochemical protocol.** Planetary milling was performed in a Retsch PM100 or PM200 mill, with 50 mL stainless steel grinding jar type C, with a safety clamp for air-sensitive grinding, and 25 grams of “small” 4.8 mm stainless steel (440 grade) ball bearings (ca. 57 count, <sup>3</sup>/<sub>16</sub> in, 0.44 g

ball<sup>-1</sup>). Select reactions used a 50 mL zirconia jar with 25 grams of 4 mm zirconia ball bearings (ca. 69 count, 0.36 g ball<sup>-1</sup>).

Mixer milling was performed using a Retsch MM200 with a 15-mL stainless steel Formtech Smartsnap grinding jar and “large” 9.5 mm stainless steel (440 grade) ball bearings (2 count, 3.5 g ball<sup>-1</sup>); select reactions used “small” stainless steel ball bearings (ca. 16 count, 7 g total). Select reactions used a 15-mL Teflon jar with 11 mm zirconia ball bearings (2 count, 2.9 g ball<sup>-1</sup>).

In all cases, reagents were added to the jar in a nitrogen-filled glovebox, and after milling, reactions were worked up under nitrogen atmosphere. Ball bearings and jars were thoroughly cleaned with detergent and water, then washed with acetone, and dried prior to use. If needed, 10% aqueous hydrochloric acid was used to remove residual antimony metal before cleaning.

**Table S1. Structural parameters for EX<sub>3</sub> (E = As, Sb; X = Cl, I)**

| EX <sub>3</sub>                 | E-X length (Å)    | X-E-X (deg)       | Next closest E-X <sup>b</sup> [vdW radii] <sup>c</sup> (Å) <sup>4,5</sup> | Coord. No. |
|---------------------------------|-------------------|-------------------|---------------------------------------------------------------------------|------------|
| AsCl <sub>3</sub> <sup>3</sup>  | 2.161(4)          | 98.4(5)           | N/A [3.60]                                                                | 3          |
| AsI <sub>3</sub> <sup>4,5</sup> | 2.56(7)           | 99.9(3)           | 3.55(9) [3.83]                                                            | 3          |
| SbCl <sub>3</sub> <sup>6</sup>  | 2.36 <sup>a</sup> | 94.1 <sup>a</sup> | 3.46–3.74 [3.81]                                                          | 8 (3+2+3)  |
| SbI <sub>3</sub> <sup>4,5</sup> | 2.83(4)           | 95.2(2)           | 3.24(9) [4.04]                                                            | 6 (3+3)    |

<sup>a</sup> averaged value

<sup>b</sup> length of E-X bond of next nearest neighbor.

<sup>c</sup> van der Waals radii, as specified in ref. 7 and 8, given in brackets

Each of the four group 15 halides used in this study (AsCl<sub>3</sub>, AsI<sub>3</sub>, SbCl<sub>3</sub>, and SbI<sub>3</sub>) possesses a unique structure. The bonding in each is best described as somewhere between ionic and covalent, with ionic character increasing from arsenic to antimony and from chloride to iodide.

Arsenic trichloride is a liquid at room temperature (mp = -16.2 °C). Its molecular structure is a regular trigonal pyramid.<sup>3</sup> There are no permanent intermolecular interactions in the liquid form.

Arsenic triiodide is a layered solid with identifiable AsI<sub>3</sub> units. The iodine anions are arranged in a hexagonal close packed lattice with arsenic cations filling two-thirds of the octahedral holes in every other layer.<sup>4,5</sup> The iodine layers are held together by van der Waals interactions. Each arsenic is covalently bonded to three iodine atoms, with another set of three iodine atoms further away but within the van der Waals radii.<sup>4,5</sup> Under high pressure (>1.7 GPa), the intermolecular separation of AsI<sub>3</sub> units decreases, new intermolecular bonds form, and the environment around arsenic becomes more symmetric.<sup>9,10</sup>

The structure of antimony chloride can be described as a zigzag layered structure. There are identifiable SbCl<sub>3</sub> units of pyramidal shape. The antimony atoms intermolecularly bond with five additional chlorides to give antimony a coordination number of eight and a bicapped trigonal prism geometry.<sup>6,11</sup> The chlorides pack in distorted hexagonal close packing.

Antimony iodide is isostructural with arsenic iodide, but its bonding can be described as more ionic in nature.<sup>4,5</sup> Discrete SbI<sub>3</sub> units are observed, with longer intermolecular bonds to three more iodide atoms within van der Waals radii. Under high pressure, the environment around antimony also becomes more symmetrical, shifting from three-coordinate to six-coordinate at pressures above 1.4 GPa.<sup>12</sup>

### Experimental Details for the Preparation of [AsA'<sub>3</sub>]

Synthetic procedures were based on the synthesis of [AsA'<sub>3</sub>] as reported by Rightmire, et al.<sup>13</sup>

#### Sample mechanochemical synthesis of [AsA'<sub>3</sub>] from AsI<sub>3</sub>

Inside a glovebox, AsI<sub>3</sub> (red solid, 40 mg, 88 μmol) and K[A'] (tan solid, 63 mg, 280 μmol, 3.2 equiv.) were added to a grinding jar with ball bearings. The jar was sealed with a clamp and milled for the desired time. The jar was opened in the glovebox to reveal an orange solid. The product was extracted with minimal hexanes (< 30 mL) and filtered through a fine-porosity glass fritted funnel. The pale yellow filtrate was dried under vacuum to afford a pale yellow oil with small yellow crystals. The product mixture contained C<sub>1</sub> and C<sub>3</sub> isomers of [AsA'<sub>3</sub>] and {A'}<sub>2</sub>; the ratio of these products was determined by <sup>1</sup>H NMR in benzene-d<sub>6</sub> or toluene-d<sub>8</sub>, using the resonances in the range of 1.9 to 2.6 ppm (Table S1).

Milling conditions (mill type, time, ball and jar material, ball size) were varied as shown in Table S2; C<sub>1</sub>:C<sub>3</sub>, yields of [AsA'<sub>3</sub>], and the [AsA'<sub>3</sub>]:{A'}<sub>2</sub> ratio are shown in Figures S1-S5.

**Table S2.** <sup>1</sup>H NMR shifts used to determine ratios of C<sub>1</sub> [AsA'<sub>3</sub>], C<sub>3</sub> [AsA'<sub>3</sub>], and {A'}<sub>2</sub>

| Product                               | Chemical shift in benzene-d <sub>6</sub> (ppm) | Chemical shift in toluene-d <sub>8</sub> (ppm) | Integration | Multiplicity |
|---------------------------------------|------------------------------------------------|------------------------------------------------|-------------|--------------|
| C <sub>3</sub> [AsA' <sub>3</sub> ]   | 2.55                                           | 2.50                                           | 3H          | doublet      |
| C <sub>1</sub> [AsA' <sub>3</sub> ]-a | 2.48                                           | 2.44                                           | 1H          | doublet      |
| C <sub>1</sub> [AsA' <sub>3</sub> ]-b | 2.27                                           | 2.23                                           | 1H          | doublet      |
| C <sub>1</sub> [AsA' <sub>3</sub> ]-c | 2.61                                           | 2.57                                           | 1H          | doublet      |
| {A'} <sub>2</sub>                     | 2.02                                           | 1.99                                           | 2H          | multiplet    |

**Table S3. Milling conditions for the synthesis of [AsA<sub>3</sub>] without pre-grinding<sup>a</sup>**

| <b>Mill type</b> | <b>Jar material</b> | <b>Ball size</b> | <b>Time (min)</b> | <b>Speed</b> |
|------------------|---------------------|------------------|-------------------|--------------|
| PBM              | SS                  | Small            | 5                 | 600 rpm      |
| PBM              | SS                  | Small            | 10                | 600 rpm      |
| PBM              | SS                  | Small            | 60                | 600 rpm      |
| PBM              | ZrO <sub>2</sub>    | Small            | 10                | 600 rpm      |
| PBM              | ZrO <sub>2</sub>    | Small            | 30                | 600 rpm      |
| PBM              | ZrO <sub>2</sub>    | Small            | 60                | 600 rpm      |
| MM               | SS                  | Large            | 5                 | 30 Hz        |
| MM               | SS                  | Large            | 10                | 30 Hz        |
| MM               | SS                  | Large            | 30                | 30 Hz        |
| MM               | SS                  | Large            | 60                | 30 Hz        |
| MM               | SS                  | Small            | 5                 | 30 Hz        |
| MM               | SS                  | Small            | 10                | 30 Hz        |
| MM               | SS                  | Small            | 30                | 30 Hz        |
| MM               | SS                  | Small            | 60                | 30 Hz        |
| MM               | Teflon              | Large            | 5                 | 30 Hz        |
| MM               | Teflon              | Large            | 10                | 30 Hz        |
| MM               | Teflon              | Large            | 30                | 30 Hz        |
| MM               | Teflon              | Large            | 60                | 30 Hz        |

<sup>a</sup>Each set of conditions was run a minimum of two times



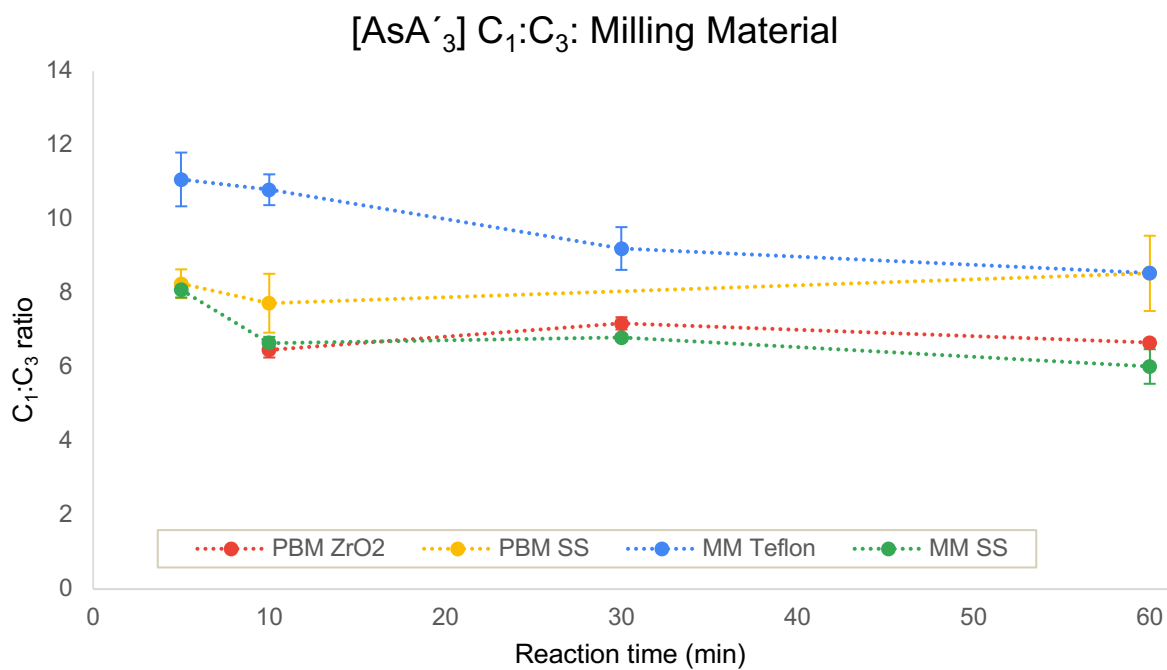

**Figure S1. [AsA<sub>3</sub>] C<sub>1</sub>:C<sub>3</sub>: Milling Material**

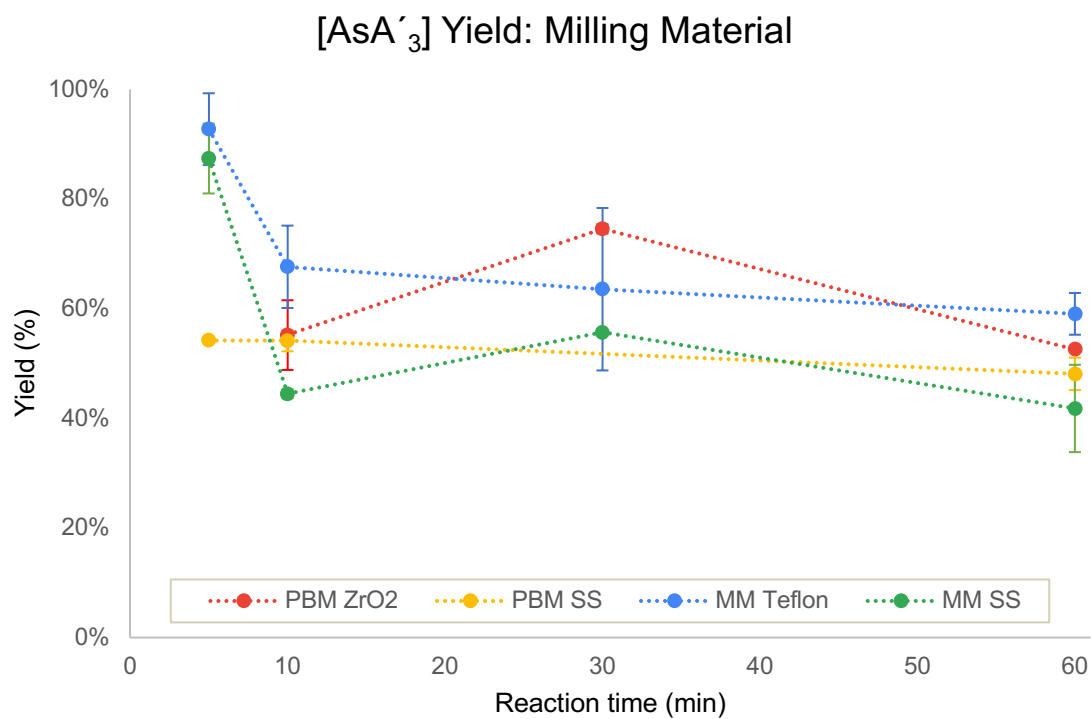

**Figure S2. [AsA<sub>3</sub>] Yield: Milling Material**

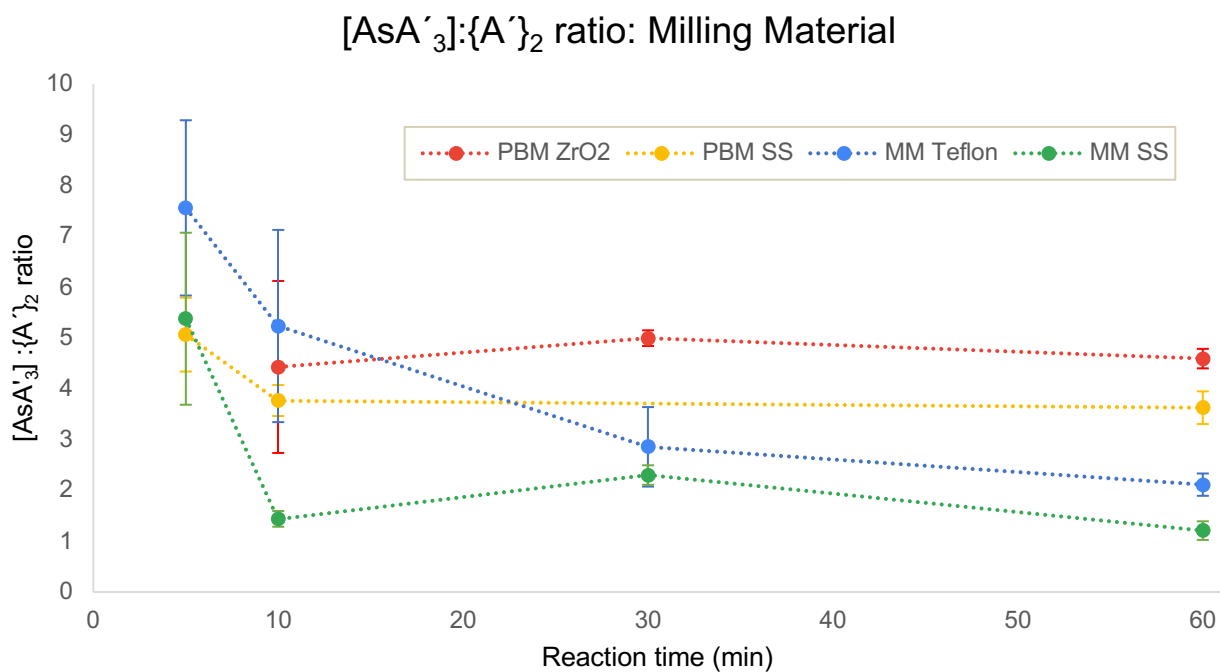

Figure S3.  $[\text{AsA}'_3]:\{\text{A}'\}_2$  ratio: Milling Material

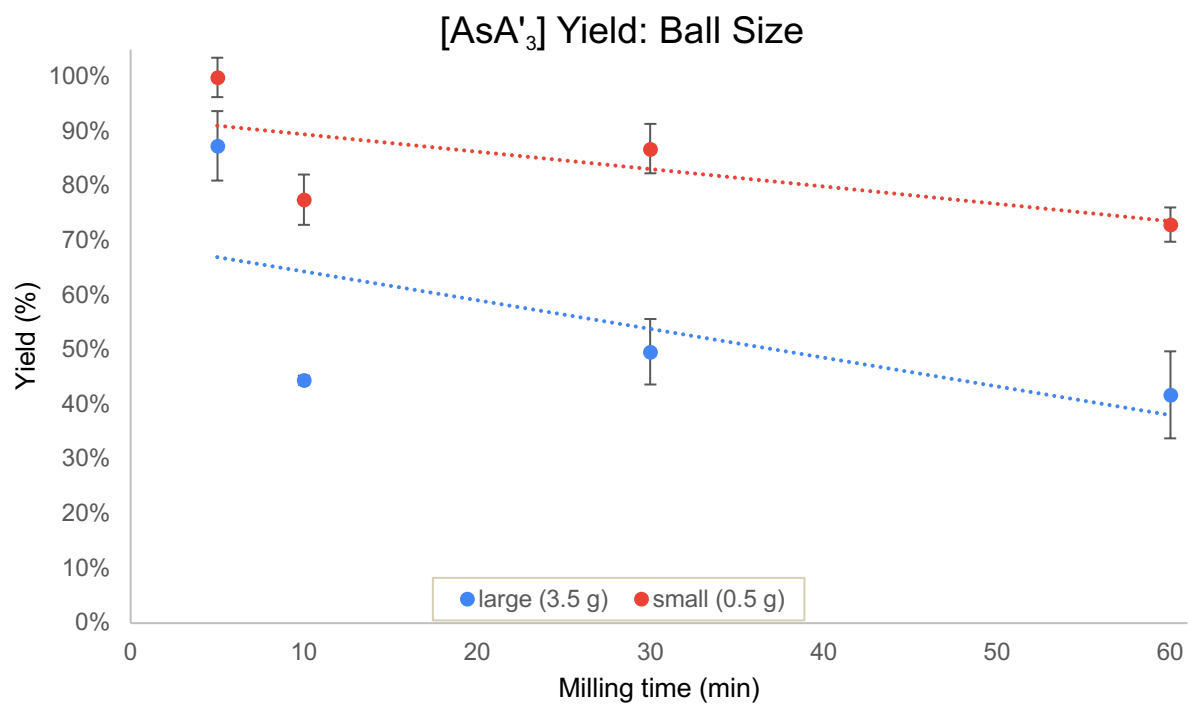

Figure S4.  $[\text{AsA}'_3]$  Yield: Ball Size

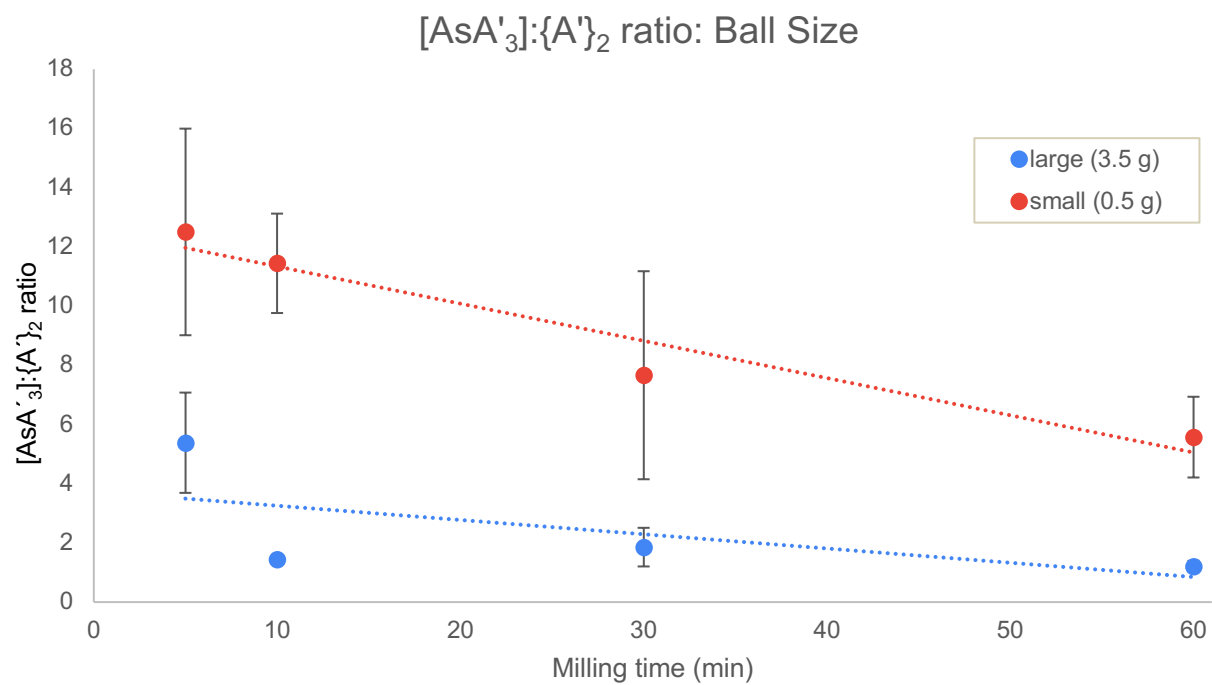

Figure S5.  $[\text{AsA}'_3]:\{\text{A}'\}_2$  ratio: Ball Size

### Mechanochemical synthesis of [AsA'<sub>3</sub>] from AsCl<sub>3</sub>

**SAFETY NOTE:** This reaction is highly exothermic and should not be performed on a larger scale!

In a glovebox, AsCl<sub>3</sub> (colorless liquid, 30 mg, 0.17 mmol) was added to a mixer mill jar with two large stainless steel ball bearings. K[A'] (112 mg, 0.50 mmol) was added, generating a small amount of white smoke from the exothermic reaction. The jar was sealed and milled for 10 min at 30 Hz. After milling, the jar was returned to the glovebox. The jar was opened to reveal a viscous orange substance. The product was extracted with minimal hexanes (< 30 mL) and filtered through a fine-porosity glass fritted funnel. The pale-yellow filtrate was dried under vacuum to afford small yellow crystals. The product mixture contained C<sub>1</sub> and C<sub>3</sub> isomers of [AsA'<sub>3</sub>] and {A'}<sub>2</sub>; the ratio of these was determined with <sup>1</sup>H NMR in benzene-d<sub>6</sub> or toluene-d<sub>8</sub>, using the resonances in the range of 1.9 to 2.6 ppm (Table S1).

### Solution synthesis of [AsA'<sub>3</sub>] from AsI<sub>3</sub>

Similar to the procedure in hexanes solution reported by Rightmire et al.,<sup>13</sup> [AsA'<sub>3</sub>] can be prepared in toluene solution, however, the reaction does not proceed as cleanly. In a glovebox, AsI<sub>3</sub> (50 mg, 0.11 mmol) was dissolved in toluene (6 mL) in a vial to give a deep yellow solution. In a round bottom flask, K[A'] (80 mg, 0.36 mmol) was suspended in toluene (20 mL) to afford an orange suspension. The AsI<sub>3</sub> solution was slowly added to the K[A'] at room temperature and allowed to stir for 3 h. The turbid orange solution was filtered through a fine-porosity glass fritted funnel to provide a yellow filtrate. Toluene was removed by vacuum, affording a mixture of [AsA'<sub>3</sub>] and {A'}<sub>2</sub> as a thin yellow oil and round colorless crystals.

### Solution synthesis of [AsA'<sub>3</sub>] from AsCl<sub>3</sub>

In a glovebox, AsCl<sub>3</sub> (85 mg, 0.47 mmol) was dissolved in toluene (5 mL) in a vial to give a colorless solution. In a round bottom flask, K[A'] (320 mg, 1.43 mmol) was suspended in toluene (20 mL) to afford an orange suspension. The AsCl<sub>3</sub> solution was slowly added to the K[A'] at room temperature and allowed to stir overnight. The hazy yellow solution was filtered through a fine-porosity glass fritted funnel to give a yellow filtrate. Toluene was removed by vacuum, affording a mixture of [AsA'<sub>3</sub>] and {A'}<sub>2</sub> as a yellow oil and yellow crystals.

### LAG reactions with AsI<sub>3</sub>

For selected mechanochemical reactions, a small amount of solvent was added to the dry AsI<sub>3</sub> and K[A'] before grinding. The solvent (hexanes, HMDSO, or THF) was measured with a 1-mL plastic pipette and added directly to the grinding jar. Immediately after the addition of solvent, the grinding jar was sealed and clamped to minimize evaporation. The reaction was milled in the planetary mill for 10 min at 600 rpm, using a 50 mL stainless steel jar and small ball bearings, and worked up as described above. The various LAG conditions are described in Tables S3 and S4; yields of [AsA'<sub>3</sub>] and the ratio of [AsA'<sub>3</sub>]:{A'}<sub>2</sub> are shown in Figures S6 and S7.

**Table S4. Milling conditions for the synthesis of [AsA'<sub>3</sub>] under LAG conditions**

| LAG solvent | Equiv. <sup>a</sup> | $\eta$ ( $\mu\text{L}/\text{mg}$ ) <sup>b</sup> |
|-------------|---------------------|-------------------------------------------------|
| hexanes     | 1                   | 0.12                                            |
| hexanes     | 2                   | 0.23                                            |
| hexanes     | 3                   | 0.35                                            |
| hexanes     | 6                   | 0.69                                            |
| hexanes     | 14                  | 1.6                                             |
| hexanes     | 30                  | 3.3                                             |
| hexanes     | 60                  | 6.9                                             |
| HMDSO       | 3                   | 0.56                                            |
| HMDSO       | 5                   | 0.97                                            |

Each set of conditions was run a minimum of two times. <sup>a</sup> Equiv. of LAG solvent relative to AsI<sub>3</sub>. <sup>b</sup>  $\mu\text{L}$  of solvent divided by mg of total reagents

**Table S5. Milling conditions for the synthesis of [AsA'<sub>3</sub>] under LAG conditions and results**

| LAG solvent | Equiv. <sup>a</sup> | $\eta$ ( $\mu\text{L}/\text{mg}$ ) <sup>b</sup> | C <sub>1</sub> :C <sub>3</sub> | [AsA' <sub>3</sub> ]:{A'} <sub>2</sub> |
|-------------|---------------------|-------------------------------------------------|--------------------------------|----------------------------------------|
| THF         | 4.5                 | 0.33                                            | N/A                            | N/A, K[A'] recovered                   |
| THF         | 11                  | 0.81                                            | 3.5                            | 0.42                                   |
| THF         | 13                  | 0.95                                            | 3.3                            | 0.36                                   |

<sup>a</sup> Equiv. of LAG solvent relative to AsI<sub>3</sub>. <sup>b</sup>  $\mu\text{L}$  of solvent divided by mg of total reagents

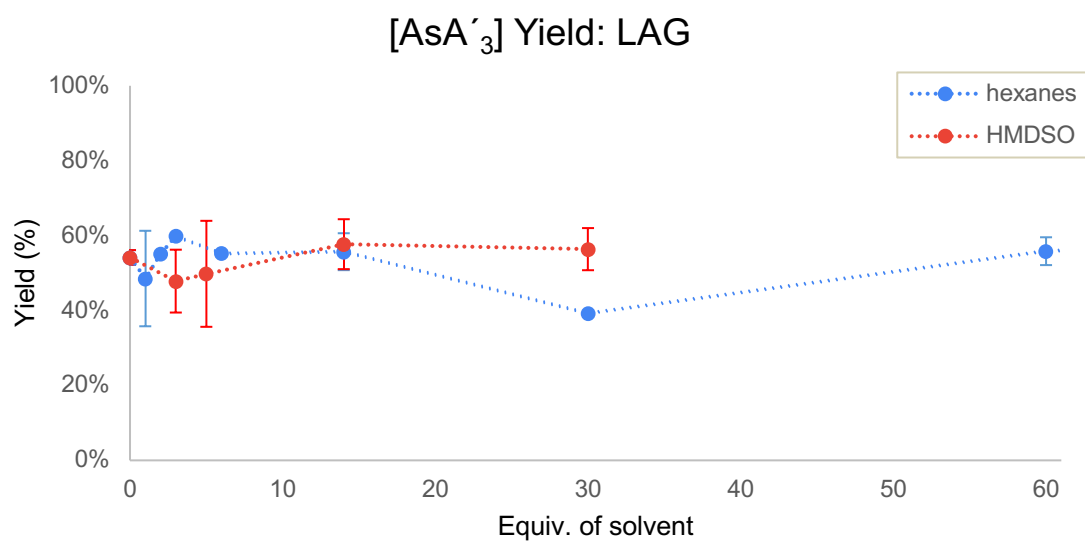Figure S6. [AsA<sub>3</sub>] Yield: LAG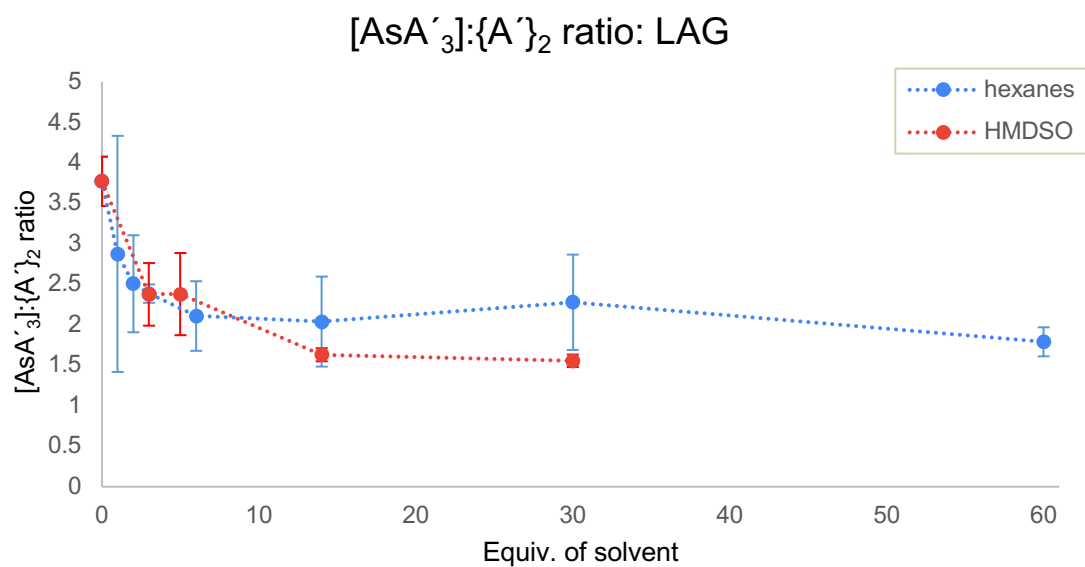Figure S7. [AsA<sub>3</sub>]:{A<sub>2</sub>} ratio: LAG

### Pre-grinding of $\text{AsI}_3$

Select mechanochemical reactions, the metal halide precursor underwent “pre-grinding.” Specifically, the metal halide was added to the grinding jar with ball bearings in the glovebox, sealed in a clamp and milled for a specified time (pre-grind time). The jar was returned to the glovebox, then opened and 3 equiv. of  $\text{K[A']}$  added. The jar was re-sealed and milled for the reaction time. The reaction was worked up as described above. The various milling conditions used are described in Table S6; yields of  $[\text{AsA}'_3]$  and the  $[\text{AsA}'_3]:\{\text{A}'\}_2$  ratio are provided in Figures S8 and S9.

**Table S6. Milling conditions for the synthesis of  $[\text{AsA}'_3]$  with pre-grinding<sup>a</sup>**

| Pre-grind time (min) | Pre-grind frequency | Reaction time (min) | Reaction frequency | Mill type |
|----------------------|---------------------|---------------------|--------------------|-----------|
| 0                    | N/A                 | 10                  | 600 rpm            | PBM       |
| 1                    | 600 rpm             | 10                  | 600 rpm            | PBM       |
| 5                    | 600 rpm             | 10                  | 600 rpm            | PBM       |
| 10                   | 600 rpm             | 10                  | 600 rpm            | PBM       |
| 15                   | 600 rpm             | 10                  | 600 rpm            | PBM       |
| 20                   | 600 rpm             | 10                  | 600 rpm            | PBM       |
| 25                   | 600 rpm             | 10                  | 600 rpm            | PBM       |
| 30                   | 600 rpm             | 10                  | 600 rpm            | PBM       |
| 45                   | 600 rpm             | 10                  | 600 rpm            | PBM       |
| 0                    | N/A                 | 10                  | 30 Hz              | MM        |
| 0.5                  | 30 Hz               | 10                  | 30 Hz              | MM        |
| 1                    | 30 Hz               | 10                  | 30 Hz              | MM        |
| 2                    | 30 Hz               | 10                  | 30 Hz              | MM        |
| 5                    | 30 Hz               | 10                  | 30 Hz              | MM        |
| 10                   | 30 Hz               | 10                  | 30 Hz              | MM        |
| 15                   | 30 Hz               | 10                  | 30 Hz              | MM        |
| 30                   | 30 Hz               | 10                  | 30 Hz              | MM        |
| 0                    | NA                  | 5                   | 30 Hz              | MM        |

Table S6 (cont.)

| Pre-grind time (min) | Pre-grind frequency | Reaction time (min) | Reaction frequency | Mill type |
|----------------------|---------------------|---------------------|--------------------|-----------|
| 0.5                  | 10 Hz               | 5                   | 30 Hz              | MM        |
| 1                    | 10 Hz               | 5                   | 30 Hz              | MM        |
| 2                    | 10 Hz               | 5                   | 30 Hz              | MM        |
| 5                    | 10 Hz               | 5                   | 30 Hz              | MM        |
| 10                   | 10 Hz               | 5                   | 30 Hz              | MM        |
| 15                   | 10 Hz               | 5                   | 30 Hz              | MM        |

<sup>a</sup>Each set of conditions was used a minimum of two times

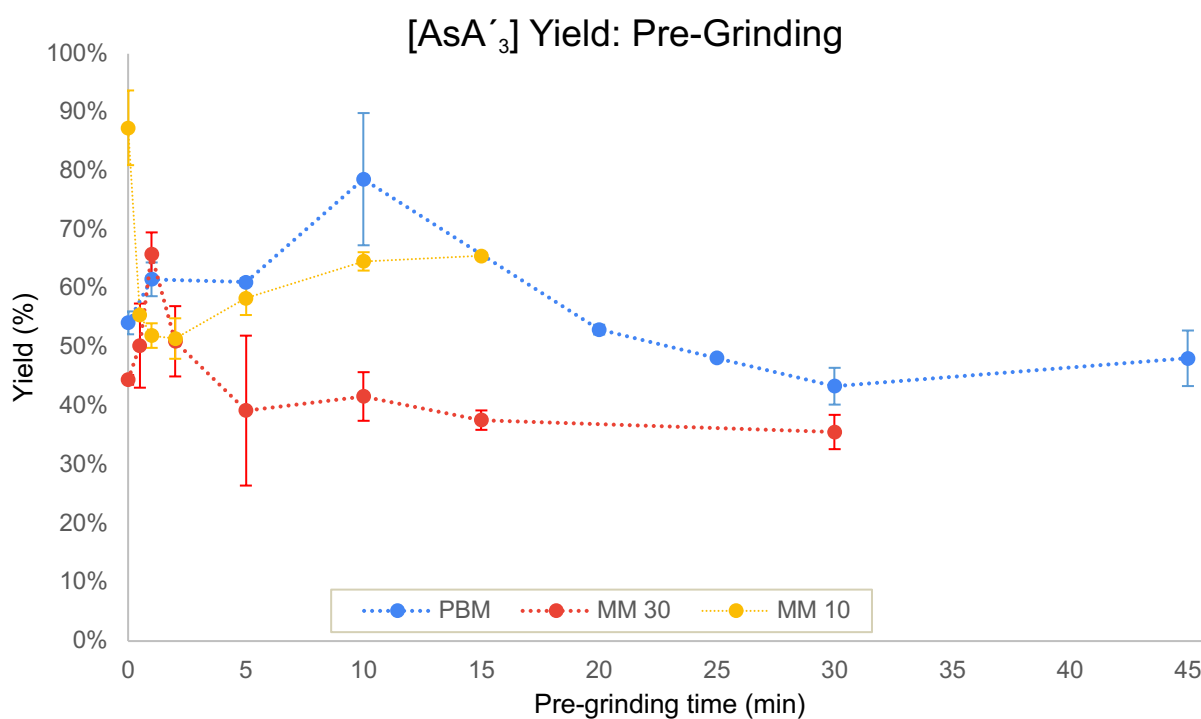Figure S8. [AsA<sub>3</sub>] Yield: Pre-Grinding



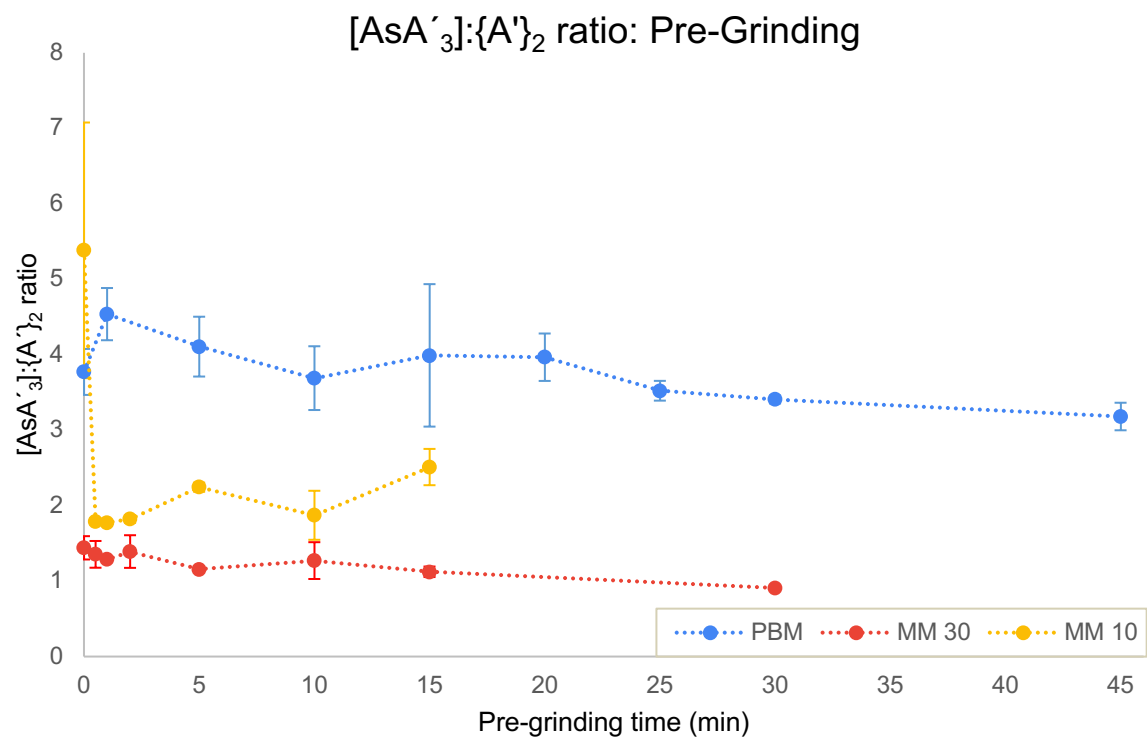

Figure S9.  $[\text{AsA}'_3]$  to  $\{\text{A}'\}_2$  ratio: Pre-Grinding

### Decomposition study: Milling [AsA'₃] alone or with KI

Prepared [AsA'₃] with {A'}₂ (30 mg) was loaded into a mixer mill stainless jar with either 2 large ball bearings or 16 small ball bearings (total mass of 7 g) and milled at 30 Hz for either 30 or 60 min. <sup>1</sup>H NMR (in C₆D₆) was taken after milling; the ratio of C₁:C₃ and [AsA'₃]:{A'}₂ were compared before and after milling, as shown in Figures S10 and S11 (green arrows).

Prepared [AsA'₃] containing {A'}₂ (30 mg) and potassium iodide (3 equiv.) were loaded into a mixer mill stainless steel jar with either 2 large ball bearings or 16 small ball bearings (total mass of 7 grams) and milled at 30 Hz for either 30 or 60 min. The product was extracted with benzene-d₆, filtered over Celite and glass wool, and <sup>1</sup>H NMR was obtained. The ratio of C₁:C₃ and [AsA'₃]:{A'}₂ were compared before and after milling, as shown in Figures S10 and S11 (blue arrows).

**Table S7. Conditions for milling decomposition studies.**

| [AsA'₃] source | Alone or with 3 KI | Ball size | Mill time (min) |
|----------------|--------------------|-----------|-----------------|
| Sample A       | Alone              | Large     | 30              |
| Sample A       | With KI            | Large     | 30              |
| Sample B       | Alone              | Large     | 60              |
| Sample B       | With KI            | Large     | 60              |
| Sample B       | Alone              | Small     | 60              |
| Sample B       | With KI            | Small     | 60              |

### Decomposition study: Heating [AsA'₃] in toluene-d₈

A solution of [AsA'₃] in toluene-d₈ (pale yellow) was prepared in an NMR tube fitted with a septum NMR cap. The cap was wrapped with Parafilm, after which an initial <sup>1</sup>H NMR spectrum was obtained. The tube was connected to the Schlenk line under nitrogen and heated in a 90 °C oil bath for 7.5 h. After heating the solution was a very pale yellow and some brown precipitate formed. A subsequent <sup>1</sup>H NMR spectrum was obtained. This process was repeated once with a different [AsA'₃] sample. The ratios of C₁:C₃ and [AsA'₃]:{A'}₂ were compared before and after heating, as shown in Figures S10 and S11.

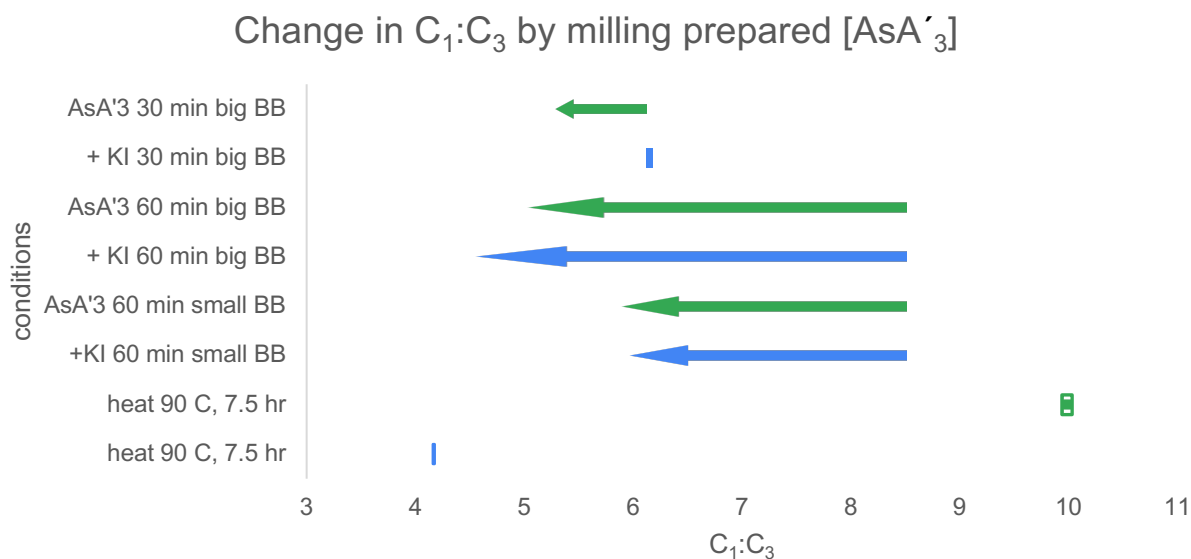

**Figure S10. Change in  $C_1:C_3$  by milling prepared  $[AsA'_3]$**

Green arrows show  $[AsA'_3]$  milled alone; blue arrows show  $[AsA'_3]$  milled with KI. Arrows point from starting value to value after milling or heating.

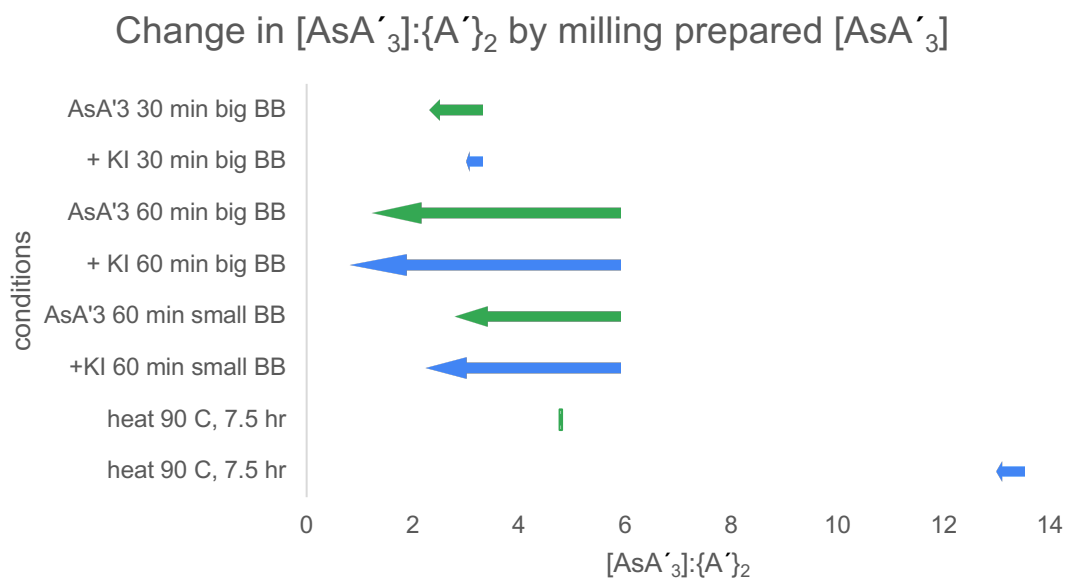

**Figure S11. Change in  $[AsA'_3]$  to  $\{A'\}_2$  by milling prepared  $[AsA'_3]$**

Green arrows show  $[AsA'_3]$  milled alone; blue arrows show  $[AsA'_3]$  milled with KI. Arrows point from starting value to value after milling or heating.

### Experimental Details for the Preparation of [SbA'₃]

Synthetic procedures were based on the synthesis of [SbA'₃] as reported by Rightmire et al.<sup>13</sup>

#### Sample mechanochemical synthesis of [SbA'₃] from SbCl₃

Inside a glovebox, SbCl₃ (solid, 50 mg, 221 μmol) and K[A'] (solid, 155 mg, 690 μmol, 3.1 equiv.) were added to a grinding jar with ball bearings. The jar was sealed with a clamp and milled for the desired time. The jar was opened in the glovebox to reveal a black solid. The product was extracted with minimal hexanes (< 30 mL) and filtered through a fine-porosity glass fritted funnel. The pale-yellow filtrate was dried under vacuum to afford a pale yellow oil with small yellow crystals. The product mixture contained C₁ and C₃ isomers of [SbA'₃] along with {A'}₂; the ratio of these products was determined with <sup>1</sup>H NMR spectra in benzene-d₆ or toluene-d₈, using the resonances in the range of 1.9 to 2.6 ppm (Table S8). The various milling conditions are described in Table S9; the C₁:C₃ ratio, yields of [SbA'₃] and the [SbA'₃]:{A'}₂ ratio are provided in Figures S12–S14.

**Table S8.** <sup>1</sup>H NMR shifts used to determine ratios of C₁ [SbA'₃], C₃ [SbA'₃], and {A'}₂

| Product | Chemical shift in C₆D₆ (ppm) | Chemical shift in CH₃C₆H₅ (ppm) | Integration | Multiplicity |
|---------|------------------------------|---------------------------------|-------------|--------------|
| C₃      | 2.59                         | 2.54                            | 3H          | d            |
| C₁-a    | 2.21                         | 2.17                            | 1H          | d            |
| C₁-b    | 2.55                         | 2.50                            | 1H          | d            |
| C₁-c    | 2.36                         | 2.31                            | 1H          | d            |
| A'₂     | 2.02                         | 1.99                            | 2H          | m            |

#### Sample mechanochemical synthesis of [SbA'₃] from SbI₃

Inside a glovebox, SbI₃ (pink solid, 31 mg, 61 μmol) and K[A'] (tan solid, 47 mg, 210 μmol, 3.4 equiv.) were added to a grinding jar with ball bearings. The jar was sealed with a clamp and milled for the desired time. The jar was opened in the glovebox to reveal a black solid. The product was extracted with minimal hexanes (< 30 mL) and filtered through a fine-porosity glass fritted funnel.

The pale yellow filtrate was dried under vacuum to afford a brown-yellow oil with small crystals. The product mixture contained the C<sub>1</sub> and C<sub>3</sub> isomers of [SbA'<sub>3</sub>] along with {A'}<sub>2</sub>. The various milling conditions are described in Table S9; the C<sub>1</sub>:C<sub>3</sub> ratio, yields of [SbA'<sub>3</sub>] and the [SbA'<sub>3</sub>]:{A'}<sub>2</sub> ratio are provided in Figures S12–S14.

**Table S9. Milling conditions for the synthesis of [SbA'<sub>3</sub>] without pre-grinding<sup>a</sup>**

| Sb precursor      | Mill type | Jar material     | Ball size | Time (min) | Speed   |
|-------------------|-----------|------------------|-----------|------------|---------|
| SbI <sub>3</sub>  | PBM       | SS               | Small     | 5          | 300 rpm |
| SbI <sub>3</sub>  | PBM       | SS               | Small     | 10         | 300 rpm |
| SbI <sub>3</sub>  | PBM       | SS               | Small     | 60         | 300 rpm |
| SbI <sub>3</sub>  | PBM       | ZrO <sub>2</sub> | Small     | 10         | 300 rpm |
| SbI <sub>3</sub>  | PBM       | ZrO <sub>2</sub> | Small     | 60         | 300 rpm |
| SbI <sub>3</sub>  | MM        | SS               | Large     | 10         | 20 Hz   |
| SbI <sub>3</sub>  | MM        | SS               | Large     | 15         | 20 Hz   |
| SbI <sub>3</sub>  | MM        | SS               | Large     | 60         | 20 Hz   |
| SbCl <sub>3</sub> | PBM       | SS               | Small     | 5          | 300 rpm |
| SbCl <sub>3</sub> | PBM       | SS               | Small     | 10         | 300 rpm |
| SbCl <sub>3</sub> | PBM       | SS               | Small     | 60         | 300 rpm |
| SbCl <sub>3</sub> | PBM       | ZrO <sub>2</sub> | Small     | 5          | 300 rpm |
| SbCl <sub>3</sub> | PBM       | ZrO <sub>2</sub> | Small     | 10         | 300 rpm |
| SbCl <sub>3</sub> | PBM       | ZrO <sub>2</sub> | Small     | 60         | 300 rpm |
| SbCl <sub>3</sub> | MM        | SS               | Large     | 10         | 30 Hz   |
| SbCl <sub>3</sub> | MM        | SS               | Large     | 10         | 20 Hz   |
| SbCl <sub>3</sub> | MM        | SS               | Large     | 15         | 20 Hz   |
| SbCl <sub>3</sub> | MM        | SS               | Large     | 60         | 20 Hz   |

<sup>a</sup>Each set of conditions was used a minimum of two times.

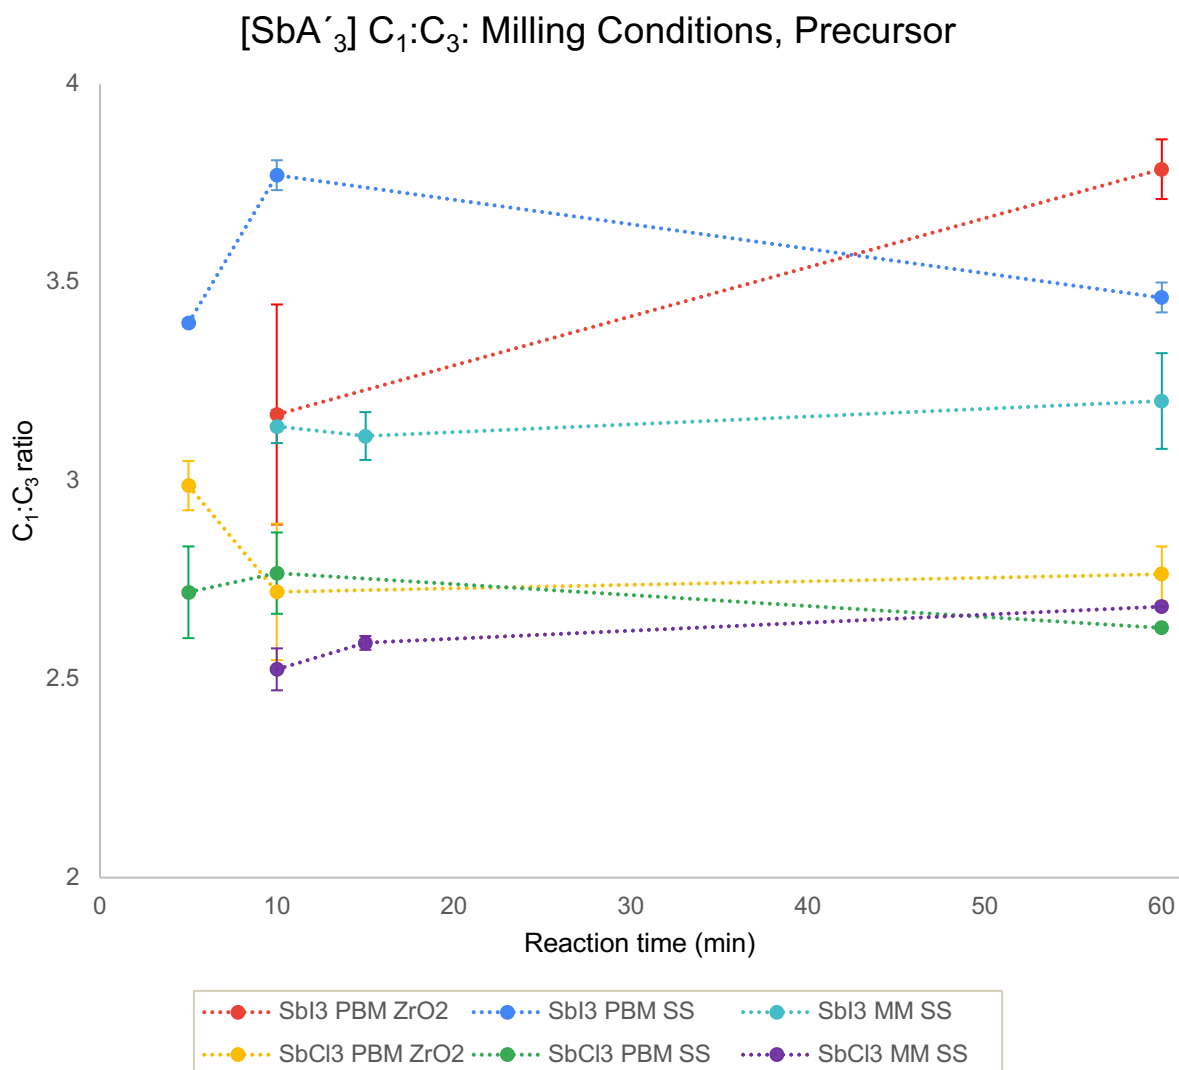

Figure S12. [SbA<sub>3</sub>] C<sub>1</sub>:C<sub>3</sub>: Mill, Material, Sb source

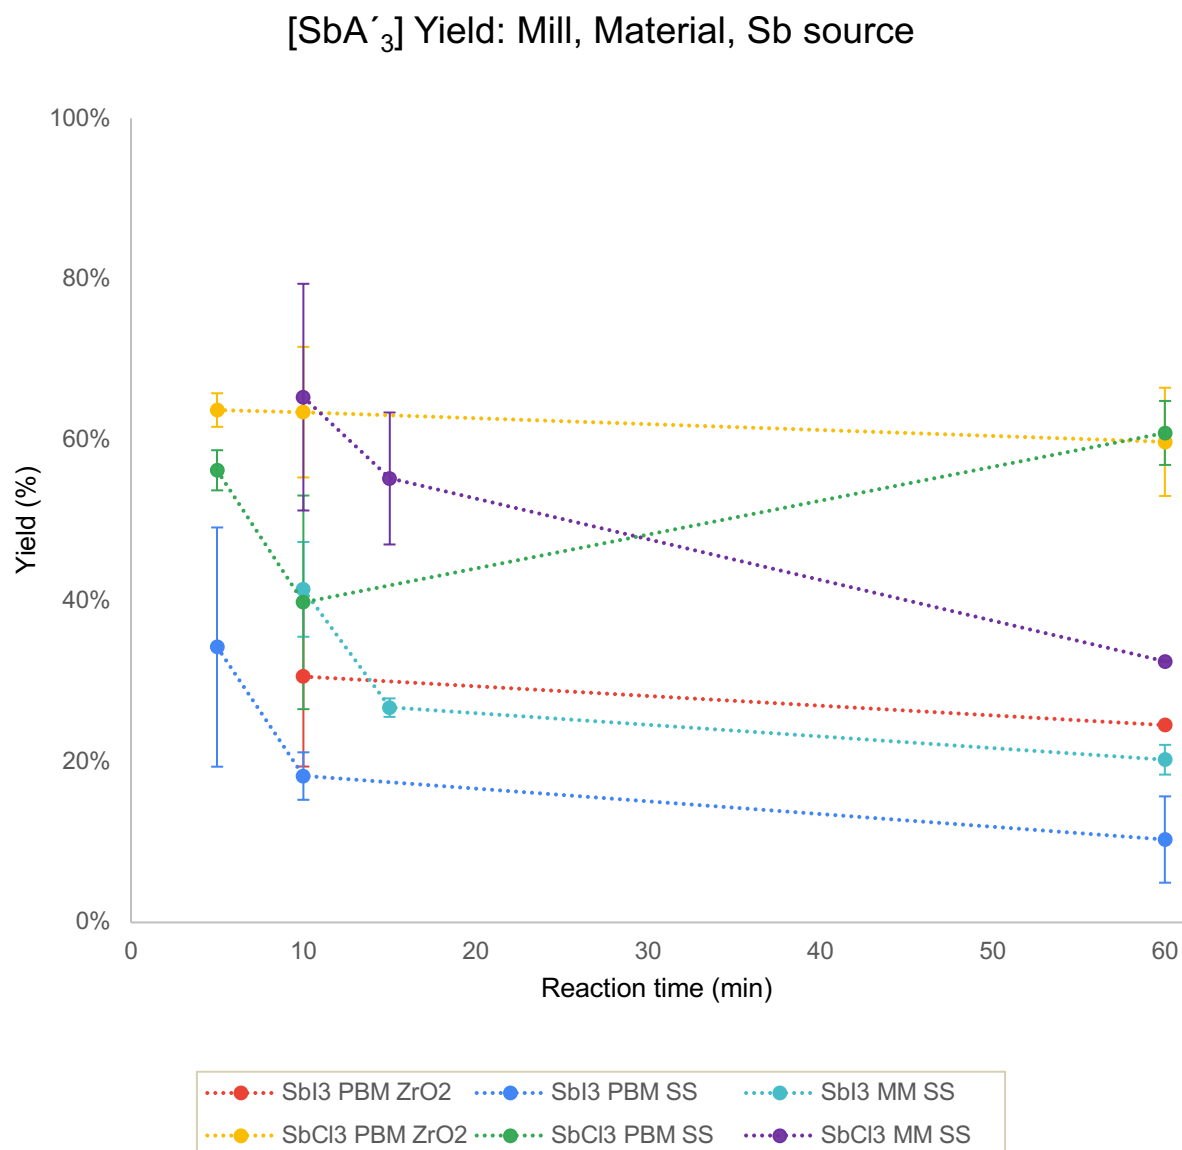

Figure S13. [SbA<sub>3</sub>] Yield: Mill, Material, Sb source

$[\text{SbA}'_3]:\{\text{A}'\}_2$  ratio: Mill, Material, Sb source

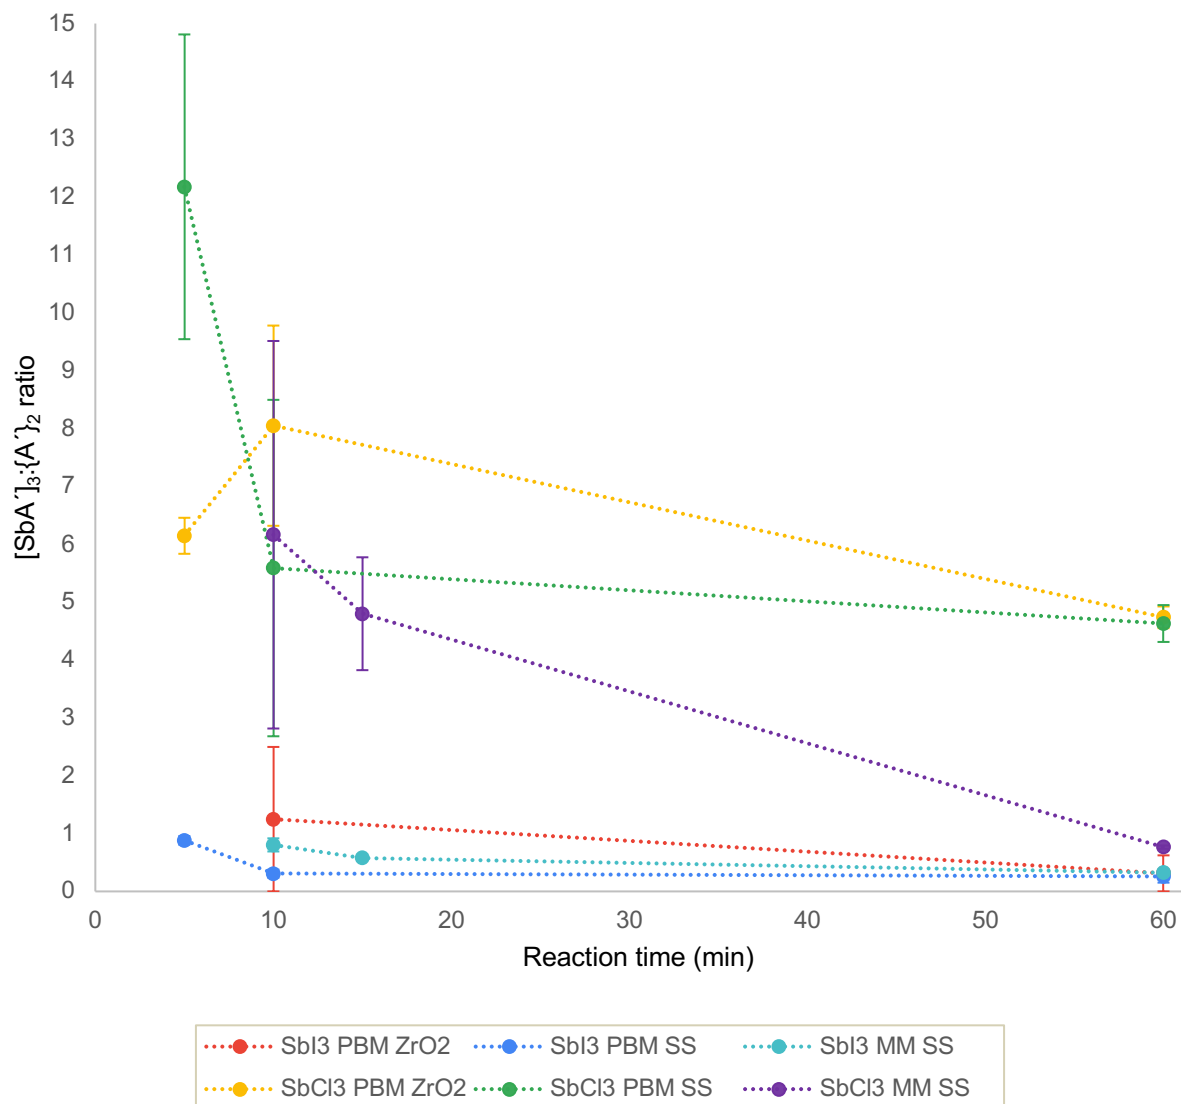

Figure S14.  $[\text{SbA}'_3]$  to  $\{\text{A}'\}_2$  ratio: Mill, Material, Sb source



### LAG reactions with $\text{SbCl}_3$

For select mechanochemical reactions, a small quantity of hexanes was added to the dry  $\text{SbCl}_3$  and  $\text{K[A}']$  before grinding. Hexanes was measuring with a 1-mL plastic pipette and added directly to the grinding jar. Immediately after the addition of solvent, the grinding jar was sealed and clamped to minimize evaporation. The reaction was milled in the planetary mill for 10 minutes at 600 rpm, using a 50 mL stainless steel jar and small ball bearings, and worked up as described above. The various LAG conditions are described in Table S10; yields of  $[\text{SbA}'_3]$  and the  $[\text{SbA}'_3]:\{\text{A}'\}_2$  ratio are shown in Figures S15 and S16.

### Solution synthesis of $[\text{SbA}'_3]$ from $\text{SbCl}_3$

In a glovebox,  $\text{SbCl}_3$  (51 mg, 0.22 mmol) was suspended in hexanes (3.49 mL, 120 equiv.) in a vial to give a colorless solution.  $\text{K[A}']$  (tan solid, 155 mg, 0.68 mmol) was added slowly while stirring at room temperature and allowed to stir for 2 h. The hazy dark solution was filtered through a fine-porosity glass fritted funnel to give a colorless filtrate and black solid. Hexanes was removed from the filtrate by vacuum, affording a mixture of  $[\text{SbA}'_3]$  and  $\{\text{A}'\}_2$  as a pale-yellow oil and colorless crystals.

**Table S10. Conditions for the synthesis of  $[\text{SbA}'_3]$  from  $\text{SbCl}_3$  under LAG or solution conditions**

| Equiv.           | $\eta$ ( $\mu\text{L}/\text{mg}$ ) |
|------------------|------------------------------------|
| 0 <sup>a</sup>   | 0                                  |
| 1 <sup>a</sup>   | 0.16                               |
| 2 <sup>a</sup>   | 0.27                               |
| 3 <sup>a</sup>   | 0.40                               |
| 6 <sup>a</sup>   | 0.87                               |
| 14 <sup>a</sup>  | 2.0                                |
| 30 <sup>a</sup>  | 4.2                                |
| 60 <sup>a</sup>  | 8.5                                |
| 93 <sup>b</sup>  | 13.6                               |
| 120 <sup>b</sup> | 17.0                               |

<sup>a</sup> Each set of LAG conditions was used a minimum of two times. <sup>b</sup> Reactions conducted once in hexanes solution with stirring.

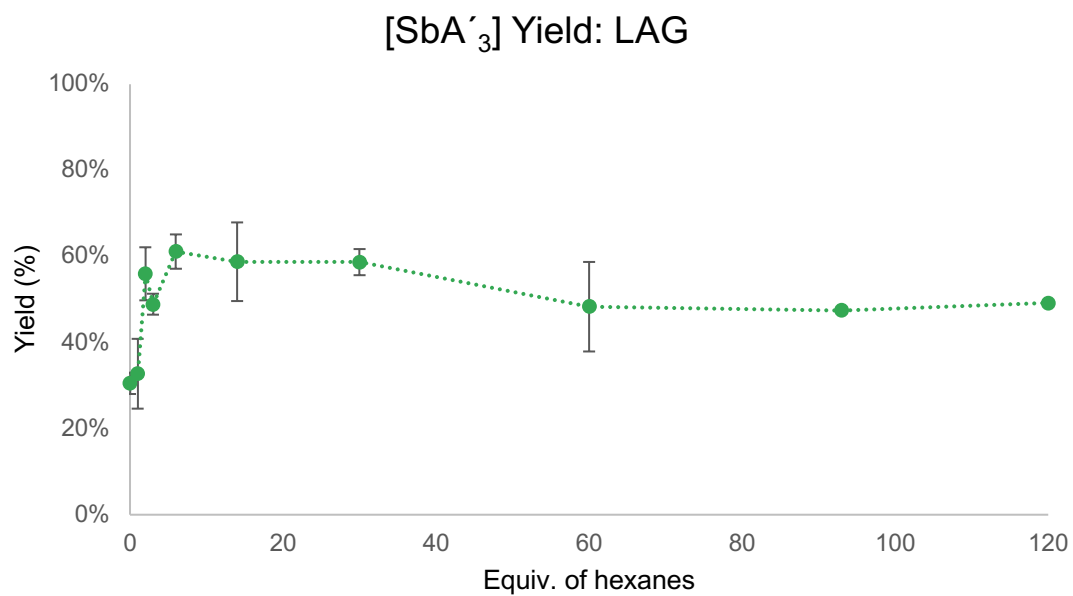

**Figure S15. [SbA<sub>3</sub>] Yield: LAG**

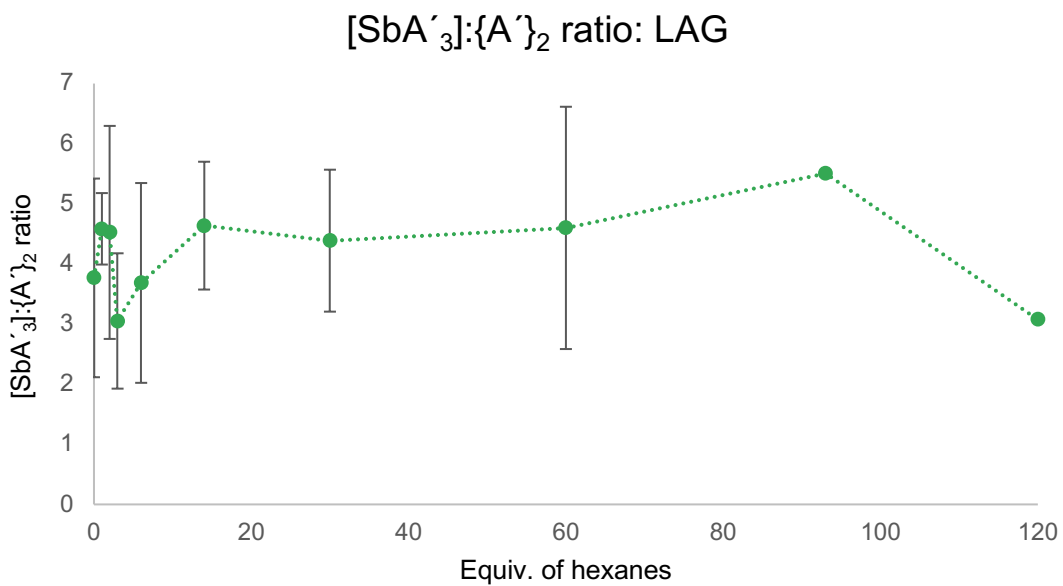

**Figure S16. [SbA<sub>3</sub>] to {A<sub>2</sub>} ratio: LAG**

### Pre-Grinding of $\text{SbCl}_3$ and $\text{SbI}_3$

For selected mechanochemical reactions, the metal halide precursor underwent pre-grinding, in which the metal halide was added to the grinding jar with ball bearings in the glovebox, sealed in a clamp and milled for a specified time (pre-grind time). The jar was returned to the glovebox, the jar was opened and 3 equiv. of  $\text{K}[\text{A}']$  was added. The jar was re-sealed and milled for a specified time (reaction time). The reaction was worked up as described above. The various milling conditions used are described in Table S11; yields of  $[\text{SbA}'_3]$  and the  $[\text{SbA}'_3]:\{\text{A}'\}_2$  ratio are provided in Figures S17–S18.

**Table S11. Milling conditions for the synthesis of  $[\text{SbA}'_3]$  with pre-grinding**

| <b><math>\text{SbX}_3</math><br/>precursor</b> | <b>Pre-grind<br/>time (min)</b> | <b>Pre-grind<br/>Frequency</b> | <b>Reaction<br/>time (min)</b> | <b>Reaction<br/>frequency</b> | <b>Mill<br/>type</b> |
|------------------------------------------------|---------------------------------|--------------------------------|--------------------------------|-------------------------------|----------------------|
| $\text{SbI}_3$                                 | 0                               | NA                             | 10                             | 300 rpm                       | PBM                  |
| $\text{SbI}_3$                                 | 1                               | 300 rpm                        | 10                             | 300 rpm                       | PBM                  |
| $\text{SbI}_3$                                 | 5                               | 300 rpm                        | 10                             | 300 rpm                       | PBM                  |
| $\text{SbI}_3$                                 | 10                              | 300 rpm                        | 10                             | 300 rpm                       | PBM                  |
| $\text{SbI}_3$                                 | 15                              | 300 rpm                        | 10                             | 300 rpm                       | PBM                  |
| $\text{SbI}_3$                                 | 30                              | 300 rpm                        | 10                             | 300 rpm                       | PBM                  |
| $\text{SbI}_3$                                 | 45                              | 300 rpm                        | 10                             | 300 rpm                       | PBM                  |
| $\text{SbCl}_3$                                | 0                               | NA                             | 10                             | 300 rpm                       | PBM                  |
| $\text{SbCl}_3$                                | 5                               | 300 rpm                        | 10                             | 300 rpm                       | PBM                  |
| $\text{SbCl}_3$                                | 10                              | 300 rpm                        | 10                             | 300 rpm                       | PBM                  |
| $\text{SbCl}_3$                                | 15                              | 300 rpm                        | 10                             | 300 rpm                       | PBM                  |
| $\text{SbCl}_3$                                | 30                              | 300 rpm                        | 10                             | 300 rpm                       | PBM                  |
| $\text{SbCl}_3$                                | 45                              | 300 rpm                        | 10                             | 300 rpm                       | PBM                  |
| $\text{SbCl}_3$                                | 60                              | 300 rpm                        | 10                             | 300 rpm                       | PBM                  |
| $\text{SbCl}_3$                                | 0                               | NA                             | 10                             | 20 Hz                         | MM                   |
| $\text{SbCl}_3$                                | 1                               | 20 Hz                          | 10                             | 20 Hz                         | MM                   |
| $\text{SbCl}_3$                                | 5                               | 20 Hz                          | 10                             | 20 Hz                         | MM                   |
| $\text{SbCl}_3$                                | 10                              | 20 Hz                          | 10                             | 20 Hz                         | MM                   |
| $\text{SbCl}_3$                                | 15                              | 20 Hz                          | 10                             | 20 Hz                         | MM                   |
| $\text{SbCl}_3$                                | 30                              | 20 Hz                          | 10                             | 20 Hz                         | MM                   |
| $\text{SbCl}_3$                                | 45                              | 20 Hz                          | 10                             | 20 Hz                         | MM                   |

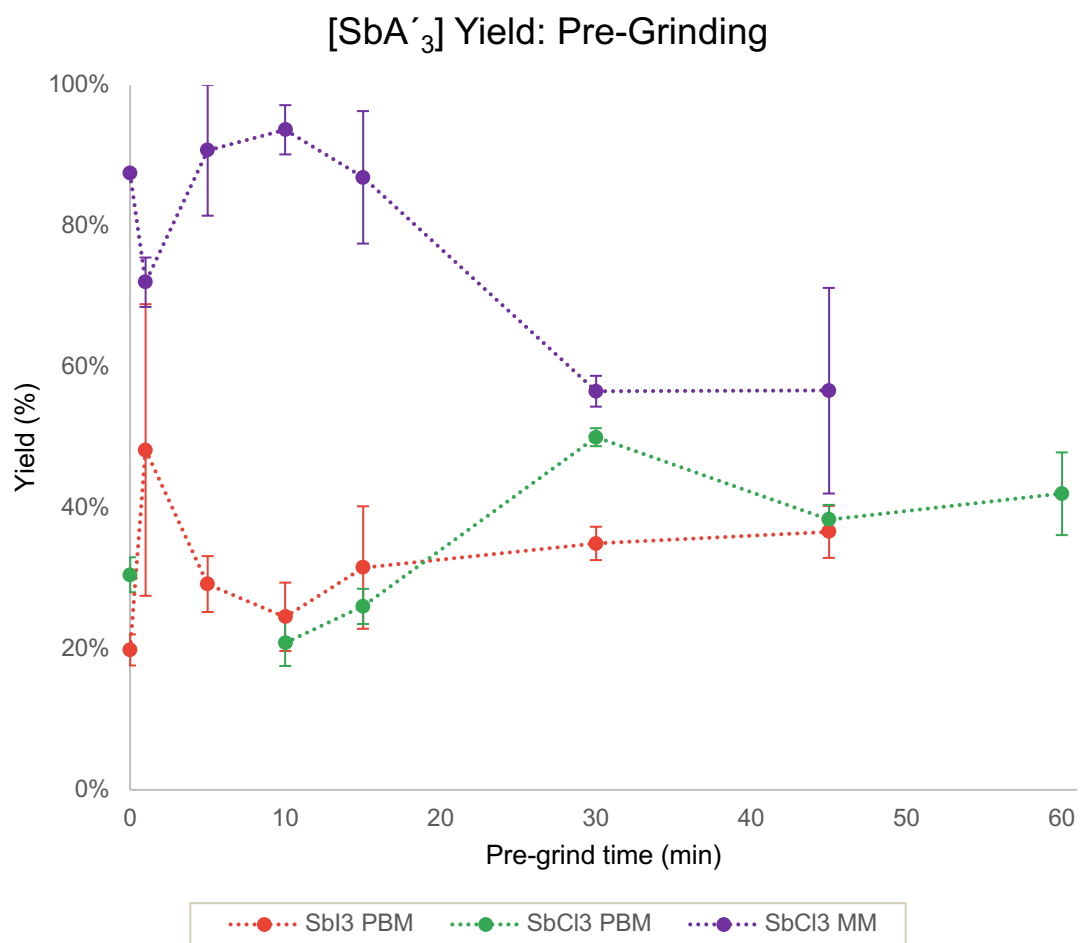

**Figure S17. [SbA<sub>3</sub>] Yield: Pre-Grinding**

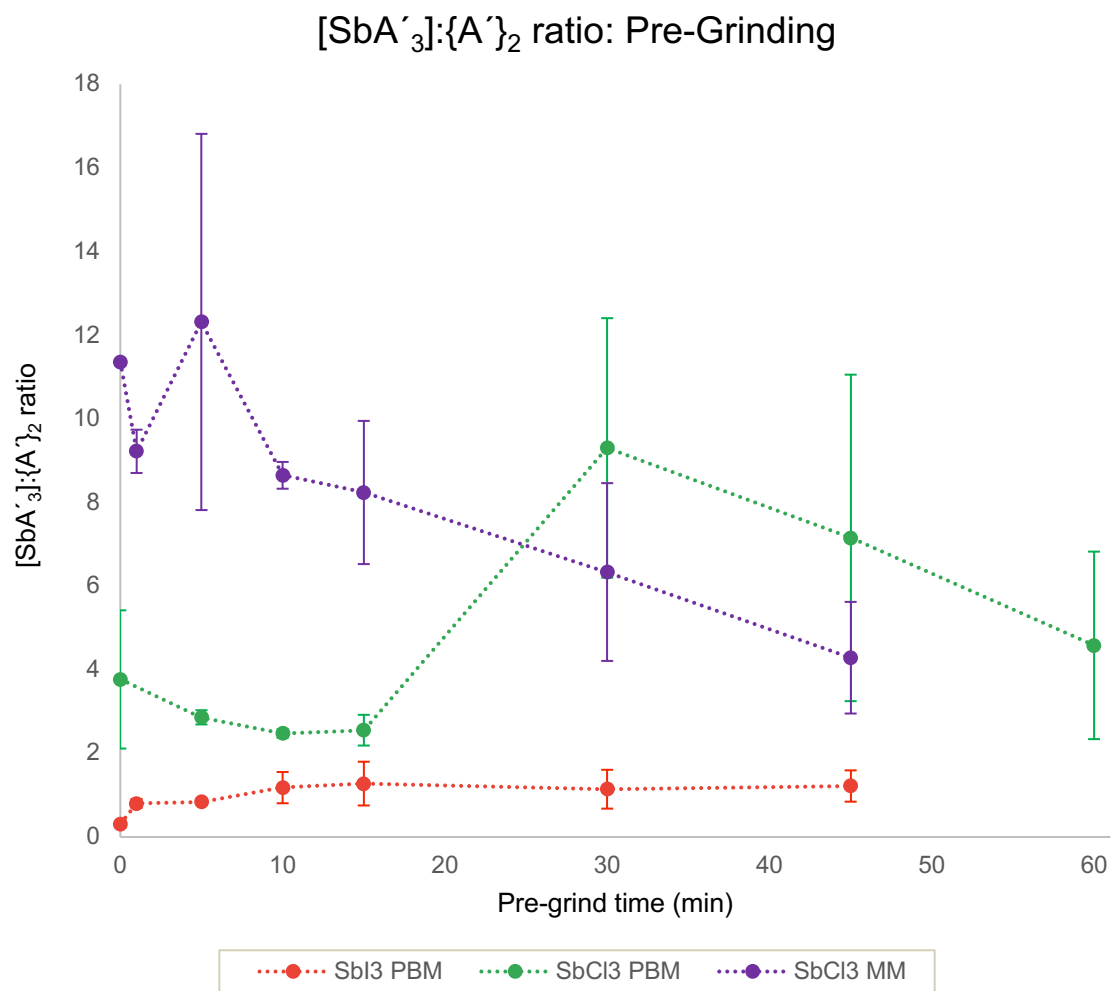

Figure S18.  $[\text{SbA}'_3]$  to  $\{\text{A}'\}_2$  ratio: Pre-Grinding

### Photographs of Pre-Ground Samples

The photographs below are of  $\text{AsI}_3$  in the mixer mill grinding jar after pre-grinding, but before addition of  $\text{K}[\text{A}']$ . Note that the color lightens from red-orange (Figure S19) to yellow (Figure S22) as pre-grinding time or frequency increases and the particle size decreases.

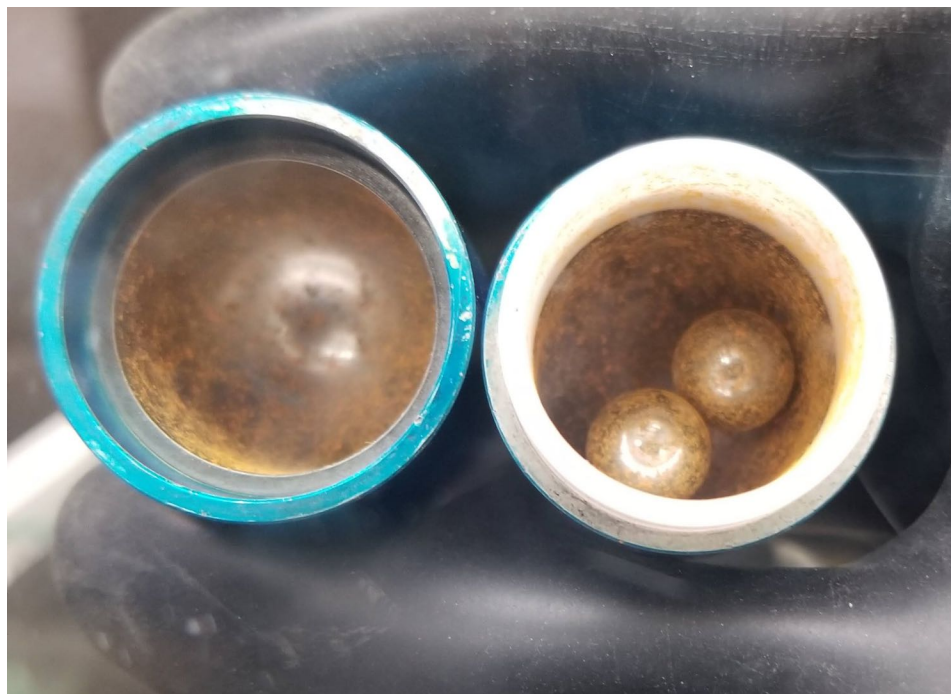

Figure S19.  $\text{AsI}_3$  ground in the mixer mill at 10 Hz for 30 s.

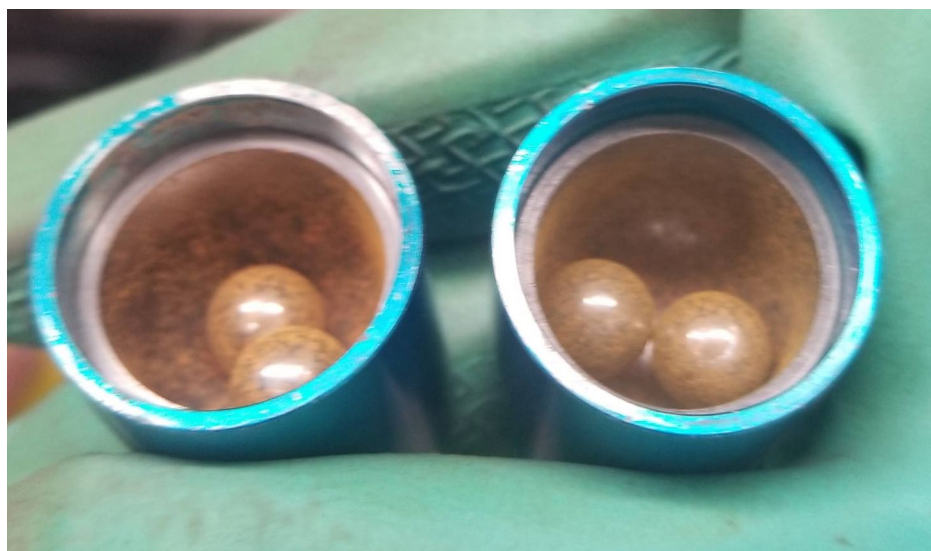

Figure S20.  $\text{AsI}_3$  ground in the mixer mill at 10 Hz for 1 min (left) or 2 min (right).

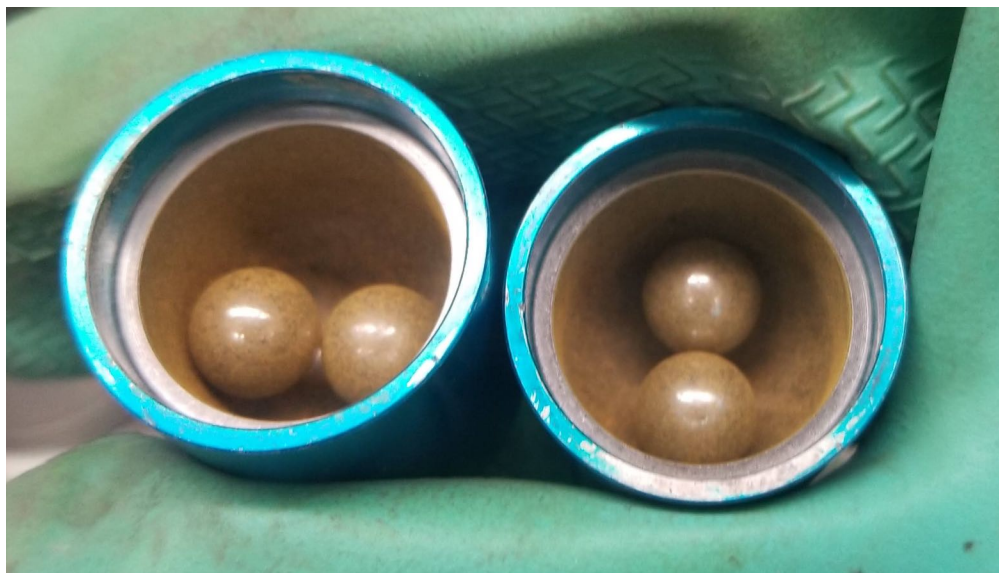

**Figure S21.**  $\text{AsI}_3$  ground in the mixer mill at 10 Hz for 5 min. (left) or 10 min. (right).

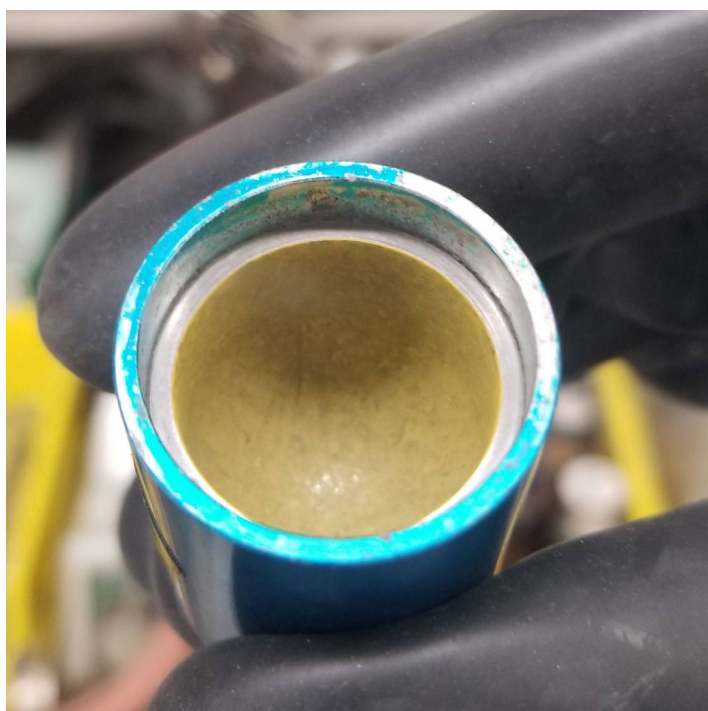

**Figure S22.**  $\text{AsI}_3$  ground in the mixer mill at 30 Hz for 2 min.  
All pre-grind samples at 30 Hz (30 sec. to 30 min.) appear visually the same.

### Scanning Electron Microscopy Procedure for SEM

Two samples were prepared for analysis by scanning electron microscopy (SEM). The unground sample was obtained from commercially available  $\text{AsI}_3$ , as received. The ground sample was prepared by milling  $\text{AsI}_3$  from the same source in the planetary mill for 45 min at 600 rpm using a 50 mL stainless steel jar and 25 g of small ball bearings. Bromopentafluorobenzene was used to transfer particles to a glass slide without dissolving them. The sample was sputter coated with gold for 20 sec. in an argon environment using a Cressington 108 Sputter Coater. Images were taken with a Zeiss Merlin Scanning Electron Microscope equipped with a GEMINI II column, using an accelerating voltage of 2.00 kV, a working distance of 9 mm, and the InLens secondary electron detector.

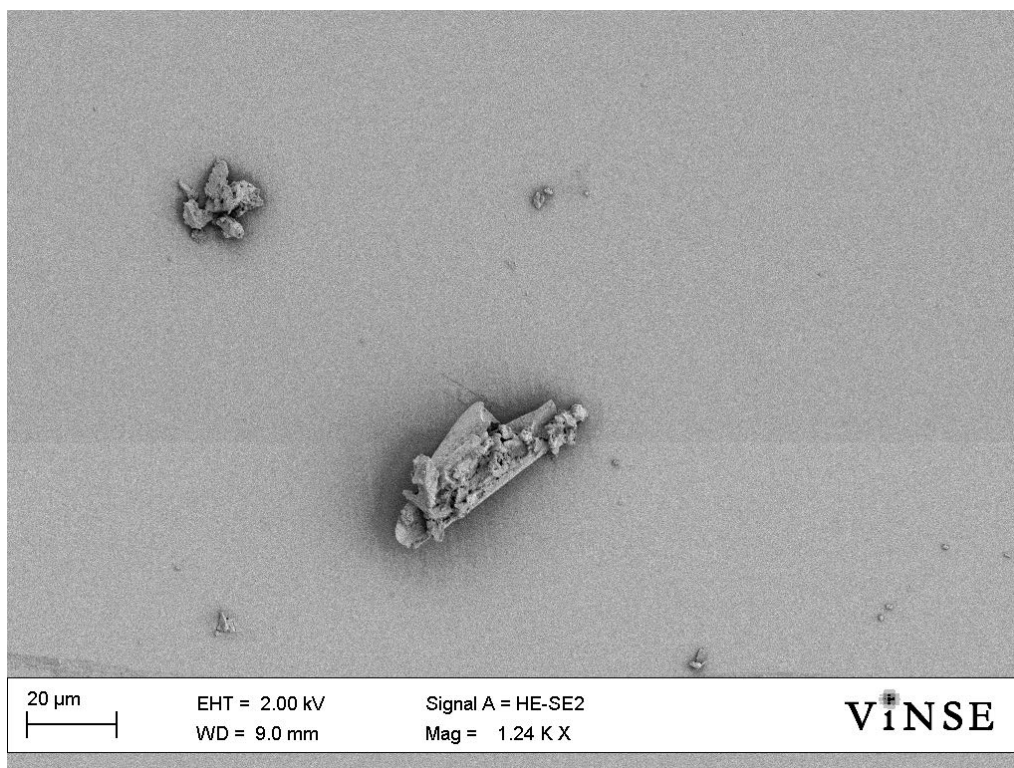

**Figure S23.** SEM image of unground  $\text{AsI}_3$



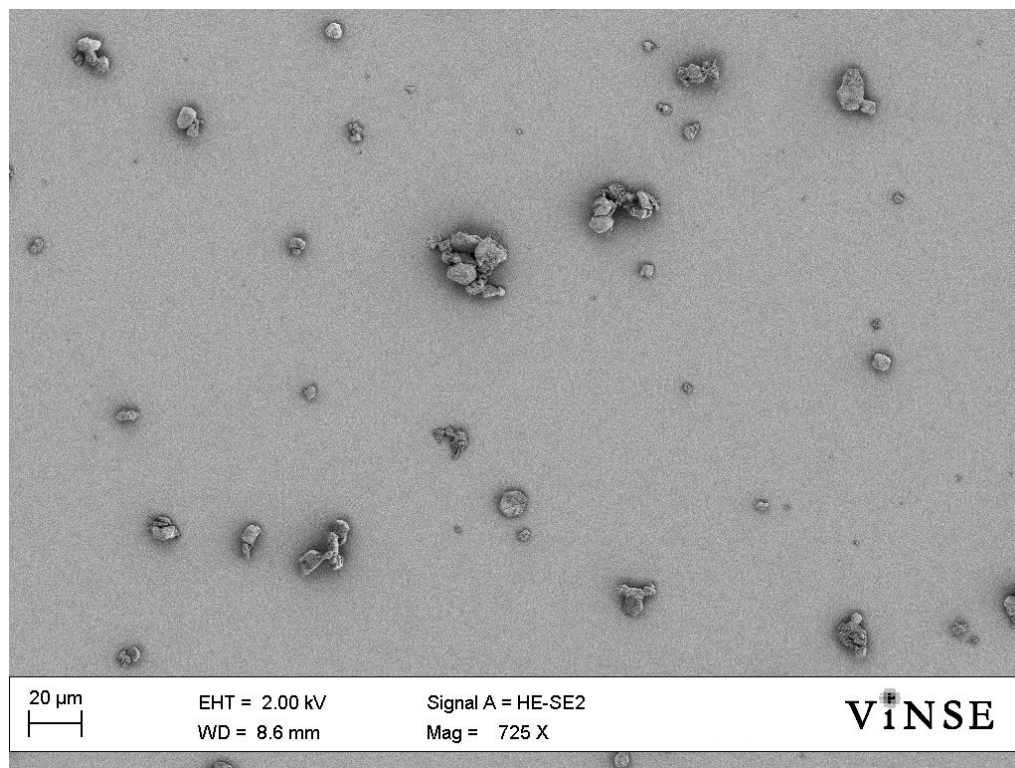

**Figure S24. SEM Image of ground  $\text{AsI}_3$**

## Powder X-Ray Diffraction

### Procedure for PXRD

A sample of  $\text{AsI}_3$  was ground in the planetary mill for 45 min at 600 rpm using a 50 mL stainless steel jar and 25 g of small ball bearings. A suspension of the powder in hexanes was drop-cast onto a low-background silicon XRD wafer in ambient conditions. Powder X-ray diffraction (XRD) spectra were obtained using a Rigaku SmartLab<sup>®</sup> X-ray Diffractometer with a  $\text{CuK}\alpha$  source and a D/TeX Ultra 250 detector. The operating voltage and current were 40 kV and 44 mA, respectively. The step size was 0.1 degree at a rate of 10 degrees per minute. The data was used to confirm the sample contained only  $\text{AsI}_3$  and no redox products.

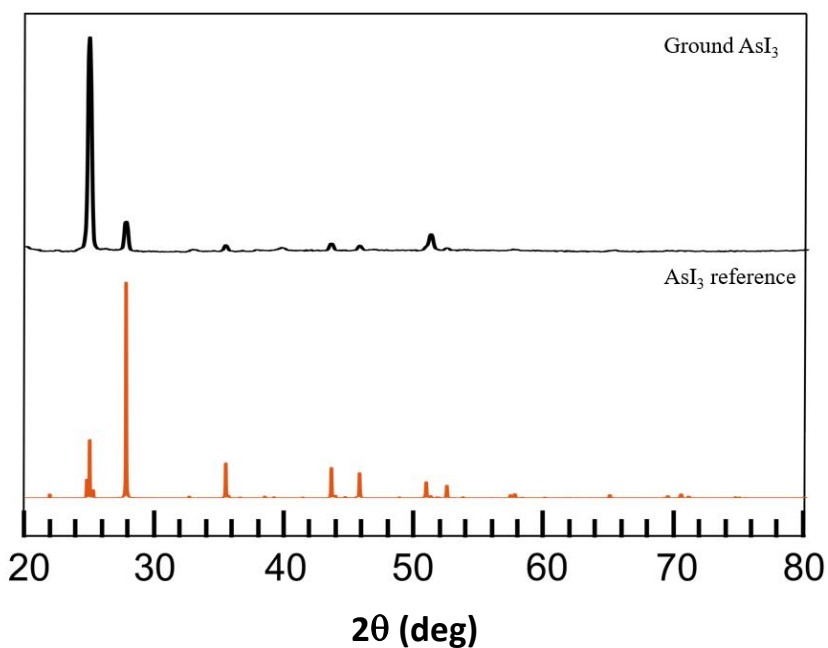

Figure S25. PXRD of  $\text{AsI}_3$  after grinding

## References

- (1) G. Fraenkel, A. Chow, W. R. Winchester. Dynamics of Solvated  $\text{Li}^+$  within *Exo,Exo*-[1,3-Bis(Trimethylsilyl)Allyl]Lithium *N,N,N',N'*-Tetramethylethylenediamine Complex. *J. Am. Chem. Soc.* 1990, **112**, 1382–1386.
- (2) D. D. Perrin, W. L. F. Armarego. *Purification of Laboratory Chemicals*, 4th ed.; Pergamon: Oxford, 1997.
- (3) P. Kisliuk, C. H. Townes. The Microwave Spectra and Molecular Structure of Phosphorus and Arsenic Trichloride. *J. Chem. Phys.* 1950, **18** (8), 1109–1110; <https://doi.org/10.1063/1.1747872>.
- (4) H. C. Hsueh, W. C. K. Poon, H. Vass, J. Crain. Pressure-Induced Electron Transfer in Quasi-Molecular Solids. *Europhys. Lett.* 1996, **35** (9), 689–694; <https://doi.org/10.1209/epl/i1996-00171-0>.
- (5) Hsueh, H. C.; Chen, R. K.; Vass, H.; Clark, S. J.; Ackland, G. J.; Poon, W. C.-K.; Crain, J. Compression Mechanisms in Quasimolecular  $\text{XI}_9$  ( $X = \text{As, Sb, Bi}$ ). *Phys. Rev. B* **1998**, *58* (22), 14812–14822; <https://doi.org/10.1103/PhysRevB.58.14812>.
- (6) A. Lipka. An X-Ray Structure Redetermination of Antimony Trichloride. *Acta Crystallogr. Sect. B Struct. Crystallogr. Cryst. Chem.* 1979, **35** (12), 3020–3022; <https://doi.org/10.1107/S0567740879011201>.
- (7) A. Bondi. van der Waals Volumes and Radii, *J. Phys. Chem.*, 1964, **68**, 441–451.
- (8) M. Mantina, A. C. Chamberlin, R. Valero, C. J. Cramer, D. G. Truhlar. Consistent van Der Waals Radii for the Whole Main Group. *J. Phys. Chem. A* 2009, **113** (19), 5806–5812; <https://doi.org/10.1021/jp8111556>.
- (9) A. Anderson, A.; S. K. Sharma; Z. Wang. Raman Study of Arsenic Tri-Iodide at High Pressures. *High Press. Res.* **1996**, *15* (1), 43–50; <https://doi.org/10.1080/08957959608240459>.
- (10) A. Saitoh; T. Komatsu; T. Karasawa. Raman Scattering under Hydrostatic Pressure in Layered  $\text{AsI}_3$  Crystals. *Phys. status solidi* **2000**, *221* (2), 573–581.
- (11) A. F. Wells. *Structural Inorganic Chemistry*, 5th ed.; Clarendon: Oxford, 1984; pp. 879–884, ISBN 0-19-855370-6.
- (12) H. Kurisu; T. Tanaka; T. Karasawa; T. Komatsu. Pressure Induced Quantum Confined Excitons in Layered Metal Tri-Iodide Crystals. *Jpn. J. Appl. Phys.* **1993**, *32* (S1), 285. <https://doi.org/10.7567/JJAPS.32S1.285>.
- (13) N .R. Rightmire, D. L. Bruns, T. P. Hanusa, W. W. Brennessel. Mechanochemical Influence on the Stereoselectivity of Halide Metathesis: Synthesis of Group 15 Tris(Allyl) Complexes. *Organometallics* 2016, **35** (11), 1698–1706; <https://doi.org/10.1021/acs.organomet.6b00151>.
